# Supplementary material
Source: PubMed Central journal article supplement (PMC3728896)

# **Bimolecular Coupling Reactions through Oxidatively Generated Aromatic Cations: Scope and Stereocontrol**

Yubo Cui, Louis A. Villafane, Dane J. Clausen, and Paul E. Floreancig\*

*Department of Chemistry, University of Pittsburgh, Pittsburgh, Pennsylvania 15260  
florean@pitt.edu*

## **Supporting Information**

|    |             |   |
|----|-------------|---|
| 1. | HPLC traces | 2 |
| 2. | NMR spectra | 7 |

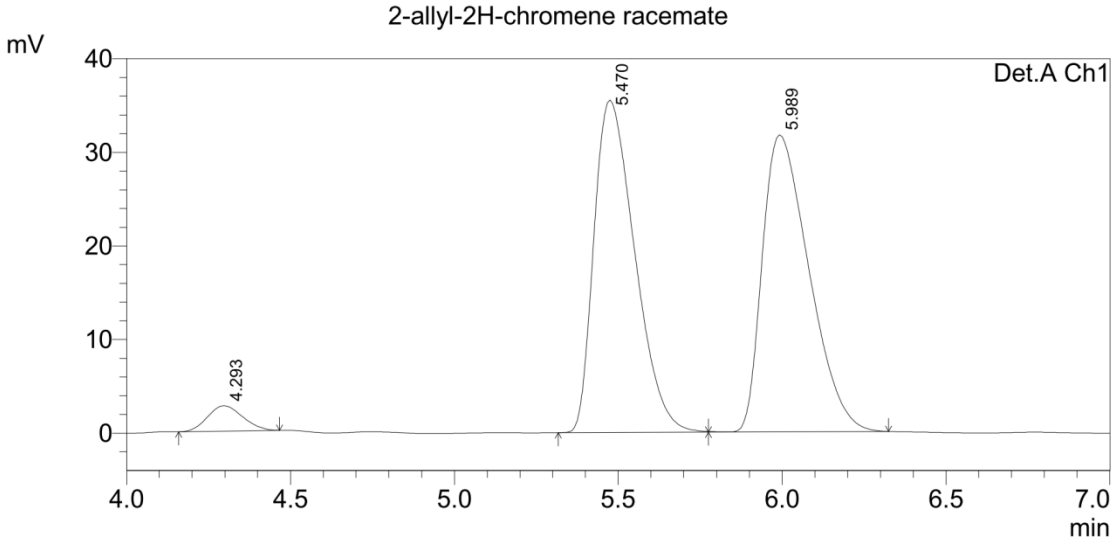

1 Det.A ChDetector A

| ID# | Name    | Ret. Time | Area   | Height |
|-----|---------|-----------|--------|--------|
| 1   | RT5.470 | 5.470     | 307283 | 35532  |
| 2   | RT5.989 | 5.989     | 314168 | 31748  |

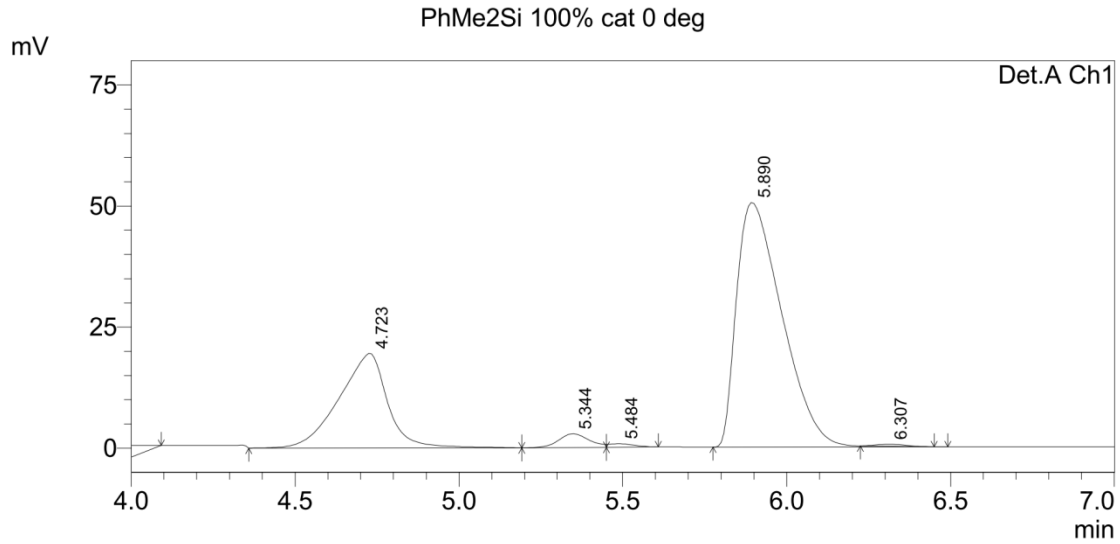

1 Det.A Ch1/ Detector A

| ID# | Name    | Ret. Time | Area   | Height |
|-----|---------|-----------|--------|--------|
| 1   | RT5.344 | 5.344     | 18526  | 2846   |
| 2   | RT5.890 | 5.890     | 488087 | 50510  |

PhMe2Si 100% cat -25

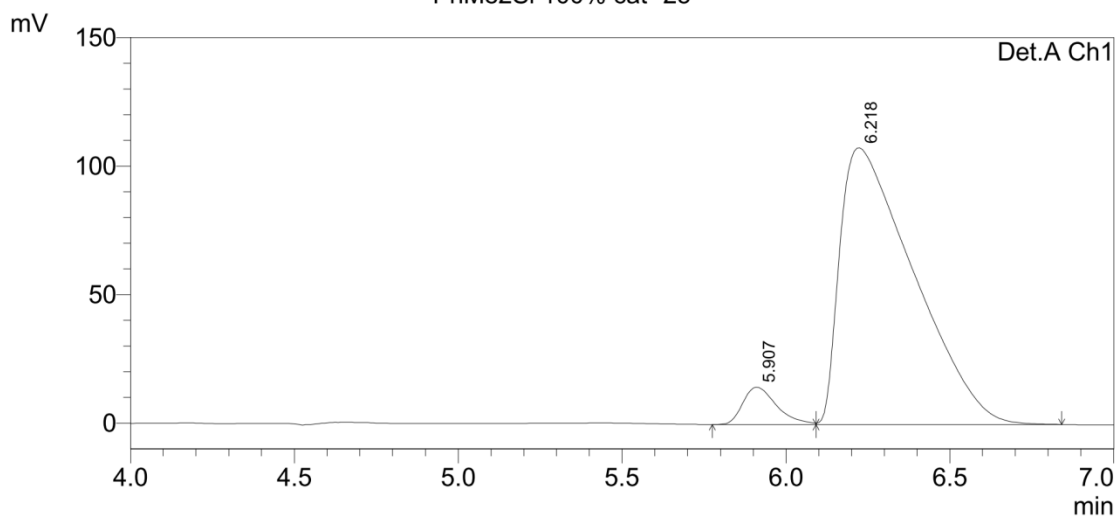

1 Det.A Ch1/

| Detector A |         |           |         |        |
|------------|---------|-----------|---------|--------|
| ID#        | Name    | Ret. Time | Area    | Height |
| 1          | RT5.907 | 5.907     | 104114  | 14560  |
| 2          | RT6.218 | 6.218     | 1688670 | 107665 |

AllylPh3tin 20% cat -25

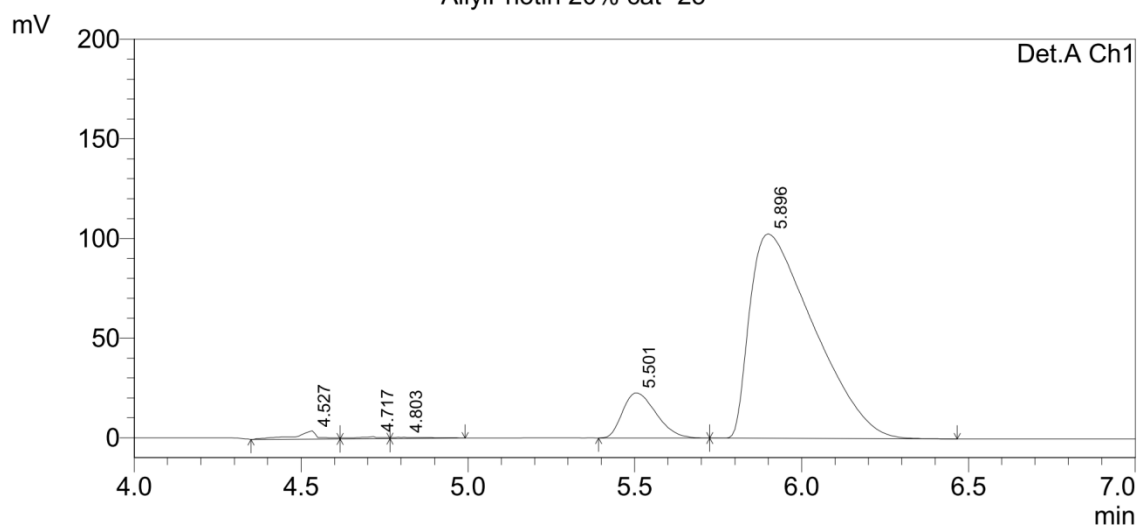

1 Det.A Ch1/Detector A

| ID# | Name    | Ret. Time | Area    | Height |
|-----|---------|-----------|---------|--------|
| 1   | RT5.501 | 5.501     | 157665  | 22594  |
| 2   | RT5.896 | 5.896     | 1370791 | 102575 |

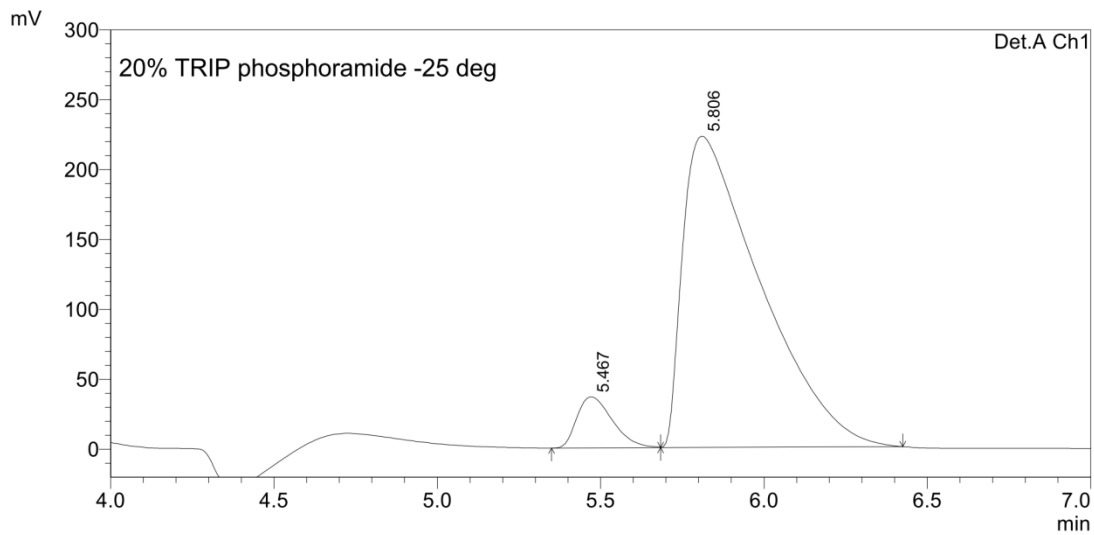

1 Det.A Ch1 Detector A

| ID# | Name    | Ret. Time | Area    | Height |
|-----|---------|-----------|---------|--------|
| 1   | RT5.467 | 5.467     | 277303  | 36576  |
| 2   | RT5.806 | 5.806     | 3696651 | 222827 |

Hydrogenation product racemic mixture (1.0 mL/min, 80% Methanol in water)

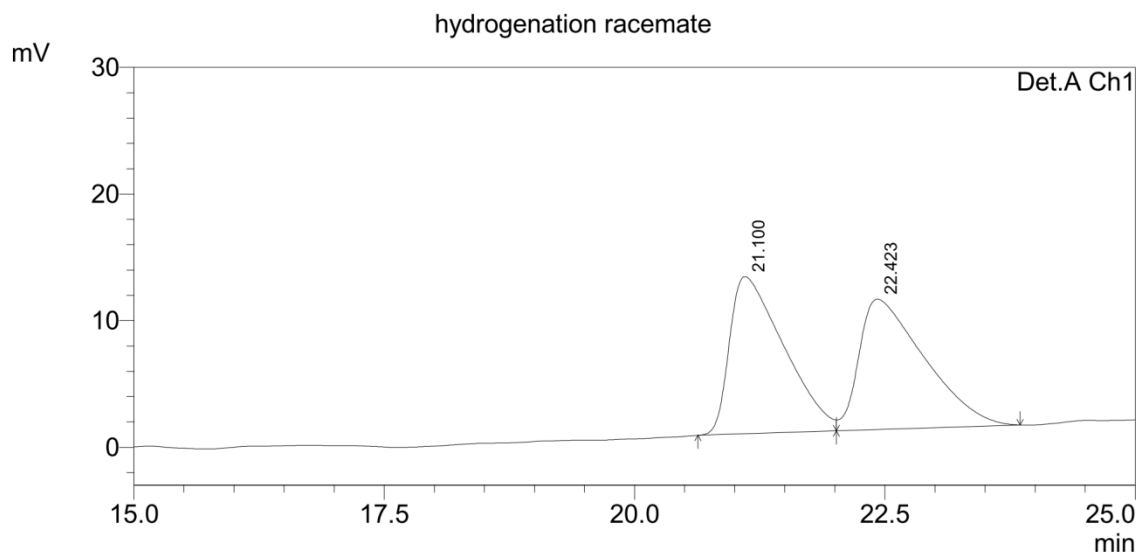

1 Det.A Ch1/

| Detector A |          |           |        |        |  |
|------------|----------|-----------|--------|--------|--|
| ID#        | Name     | Ret. Time | Area   | Height |  |
| 1          | RT21.100 | 21.100    | 466475 | 12416  |  |
| 2          | RT22.423 | 22.423    | 467034 | 10307  |  |

Hydrogenation product from independent route (Brown's reaction)

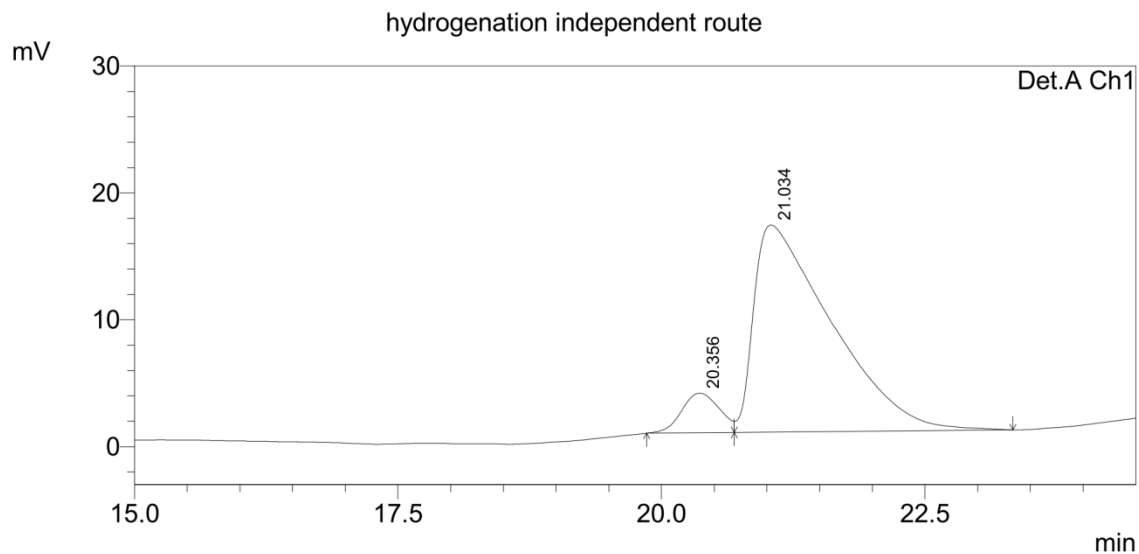

1 Det.A Ch1/

| Detector A |          |           |        |        |  |
|------------|----------|-----------|--------|--------|--|
| ID#        | Name     | Ret. Time | Area   | Height |  |
| 1          | RT20.356 | 20.356    | 77856  | 3118   |  |
| 2          | RT21.034 | 21.034    | 837583 | 16323  |  |

# Hydrogenation product from representative procedure

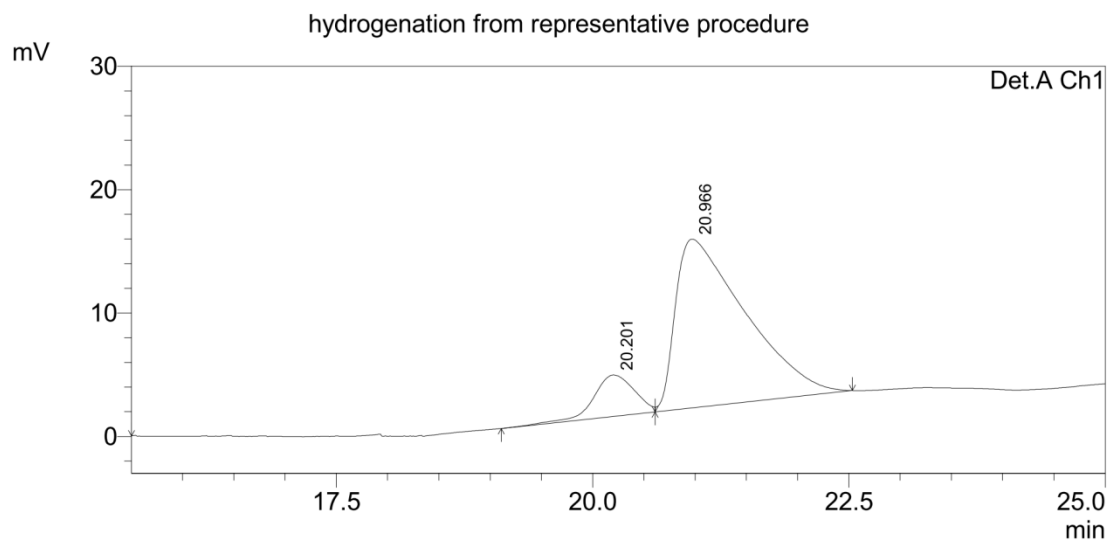

1 Det.A Ch1/

Detector A

| ID# | Name     | Ret. Time | Area   | Height |
|-----|----------|-----------|--------|--------|
| 1   | RT20.201 | 20.201    | 92597  | 3355   |
| 2   | RT20.966 | 20.966    | 645291 | 13683  |

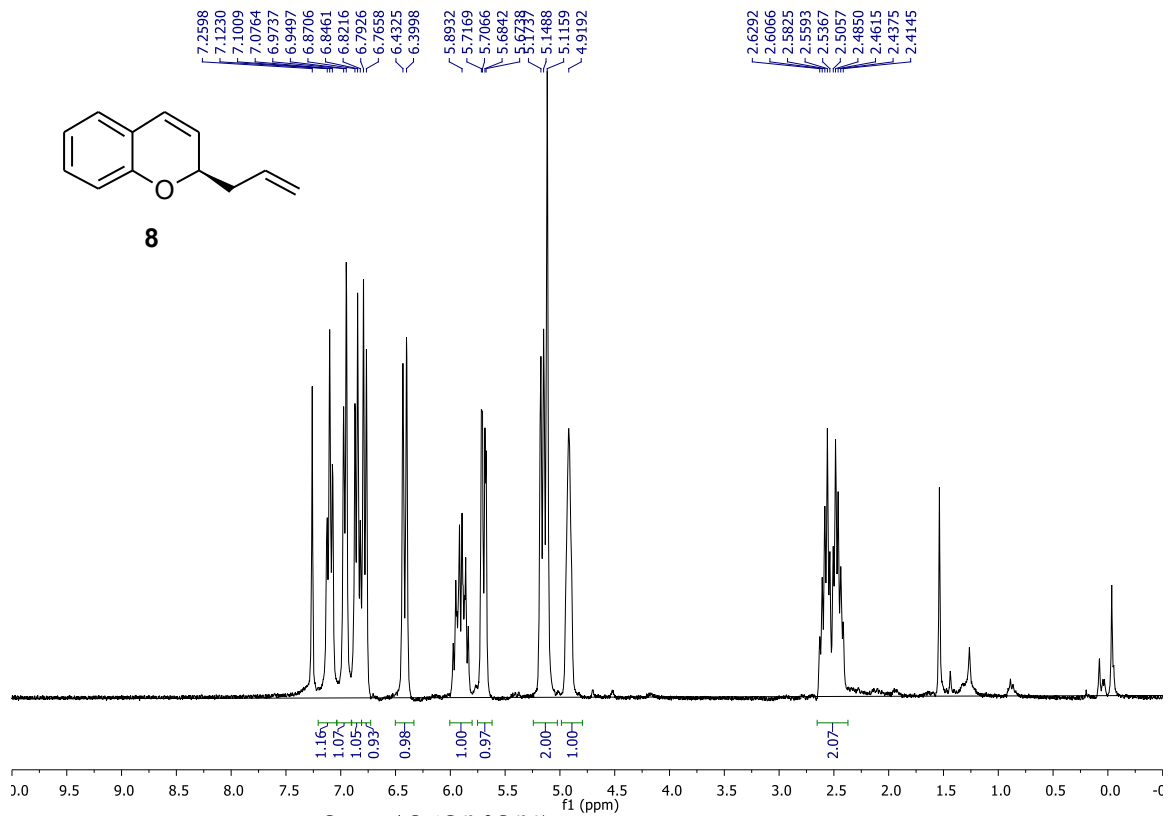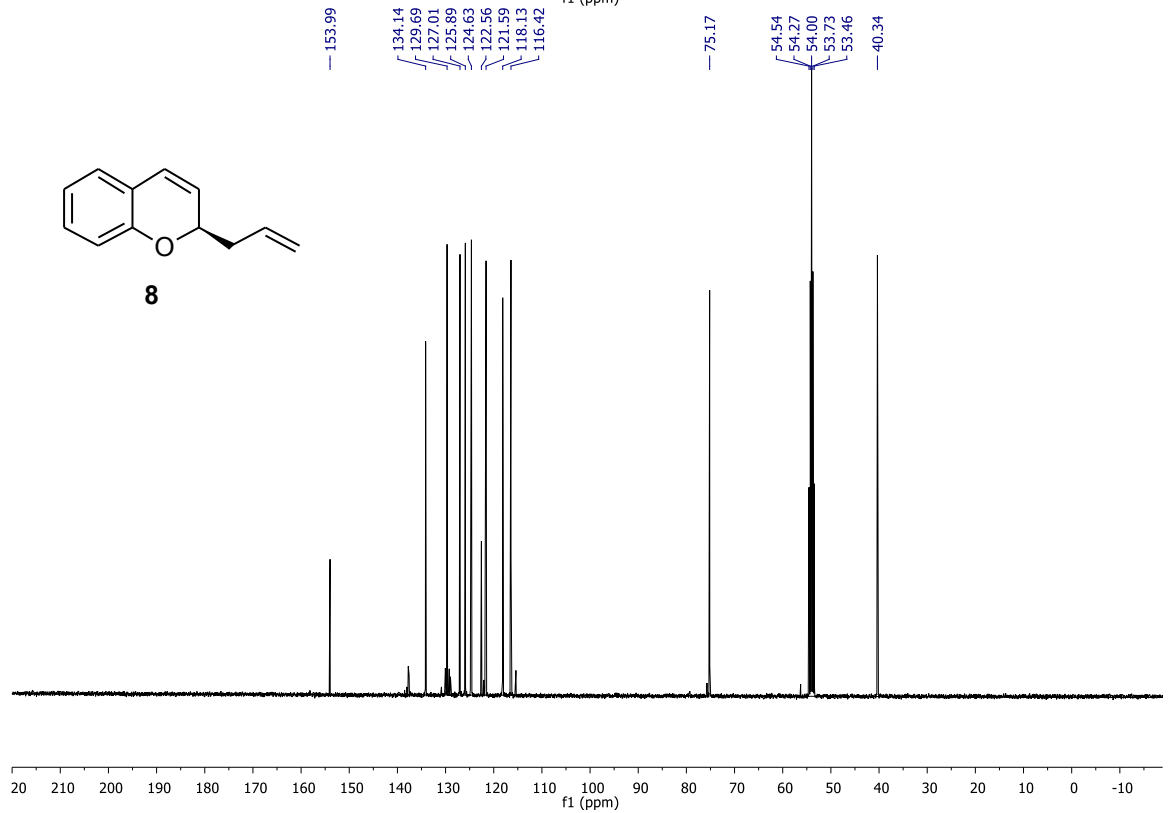

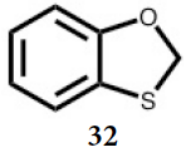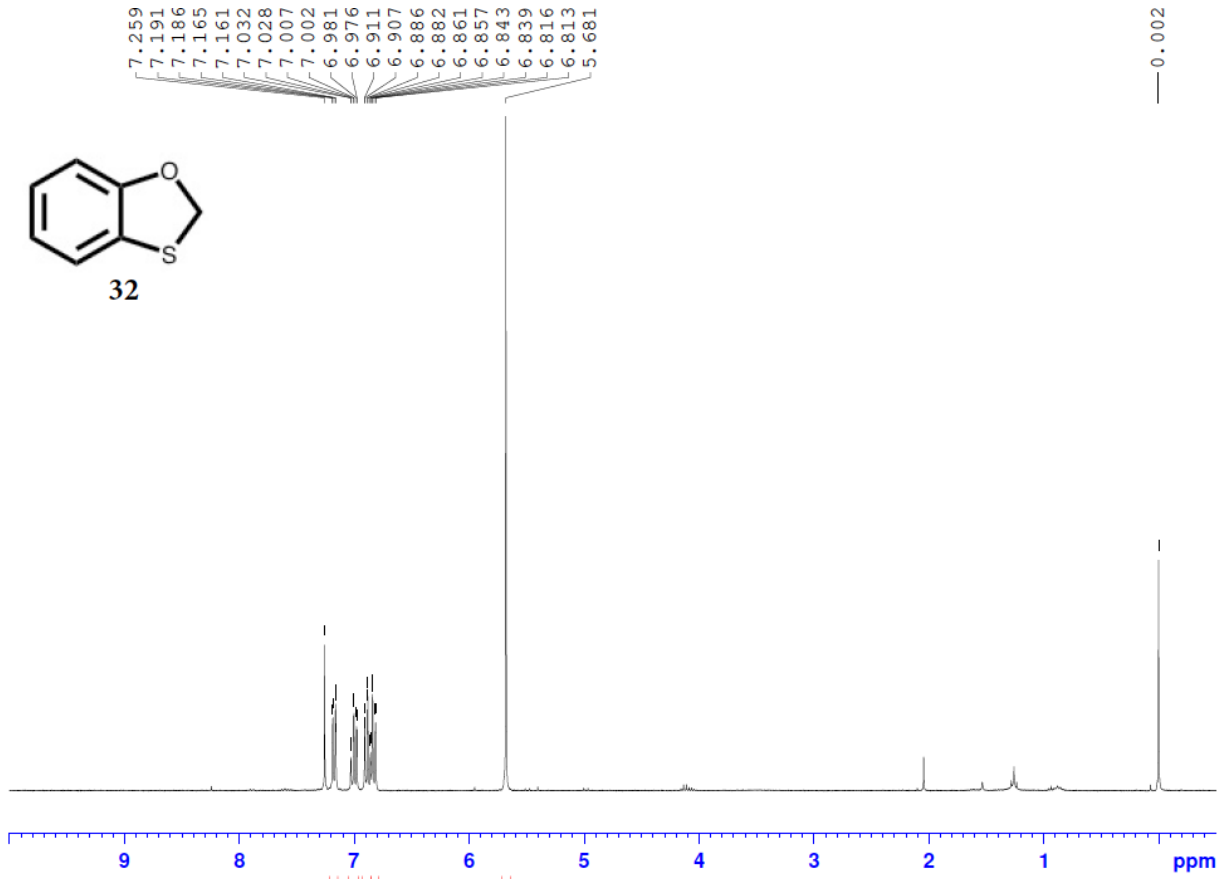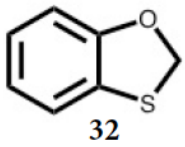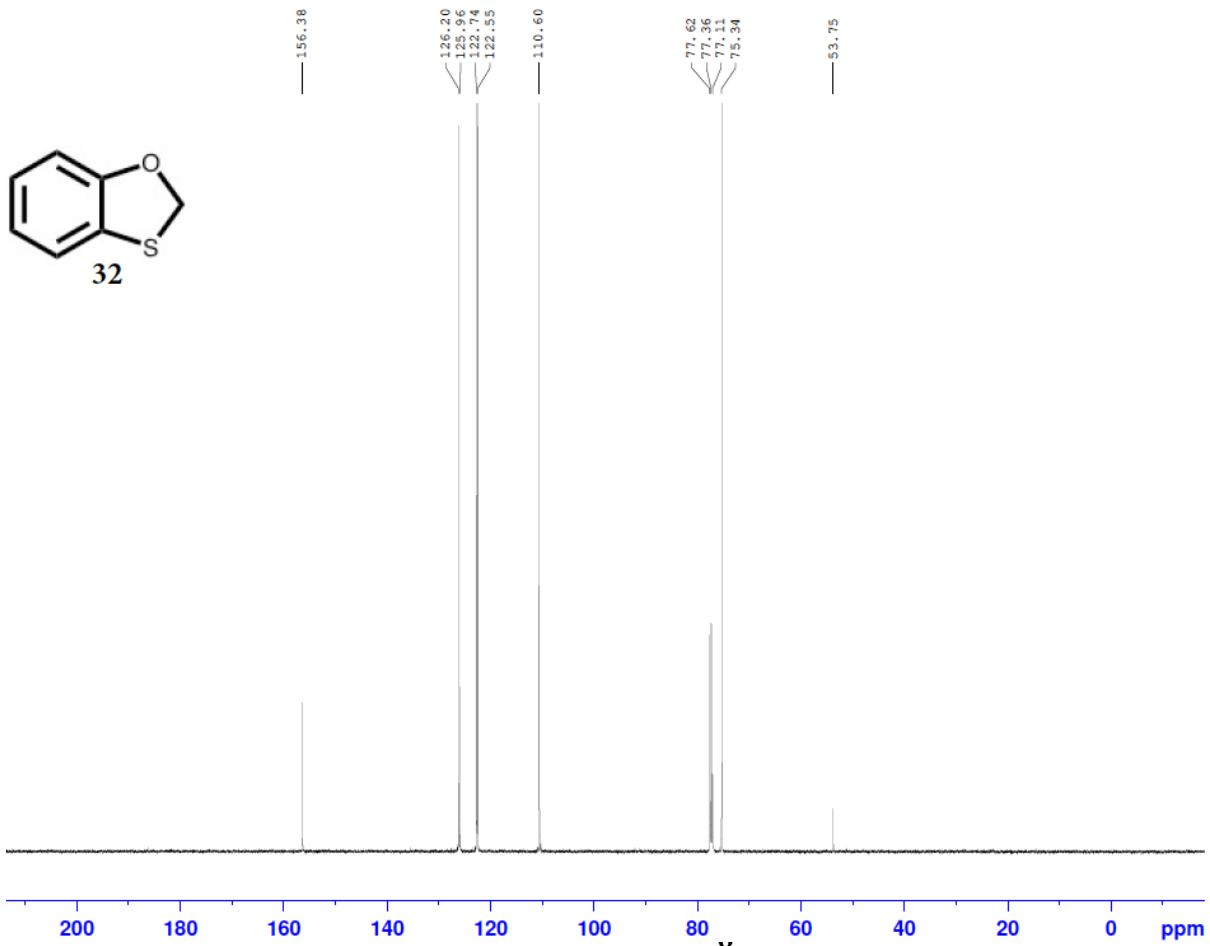



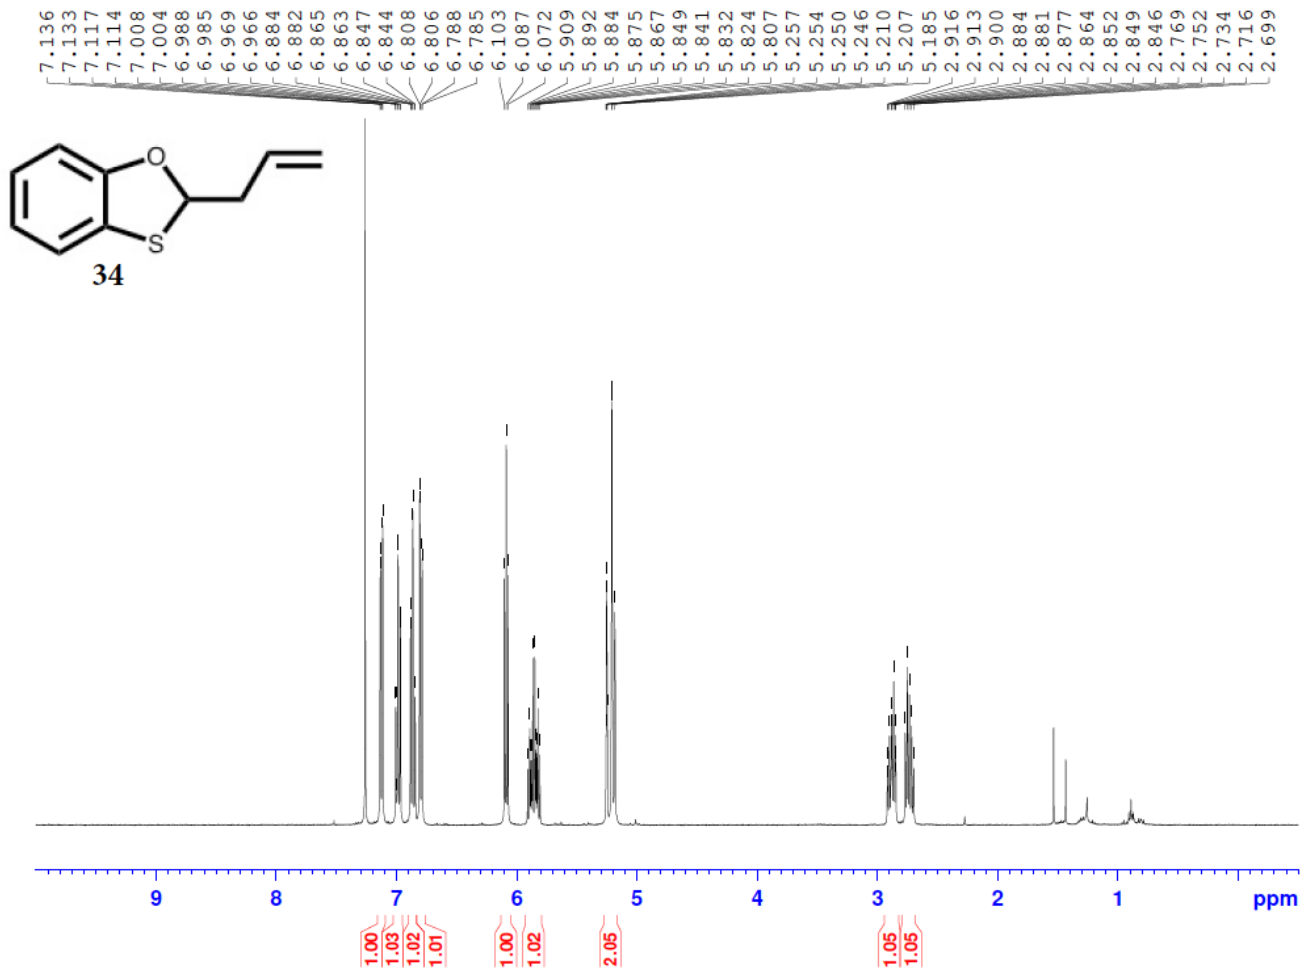

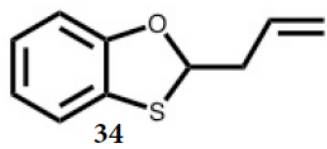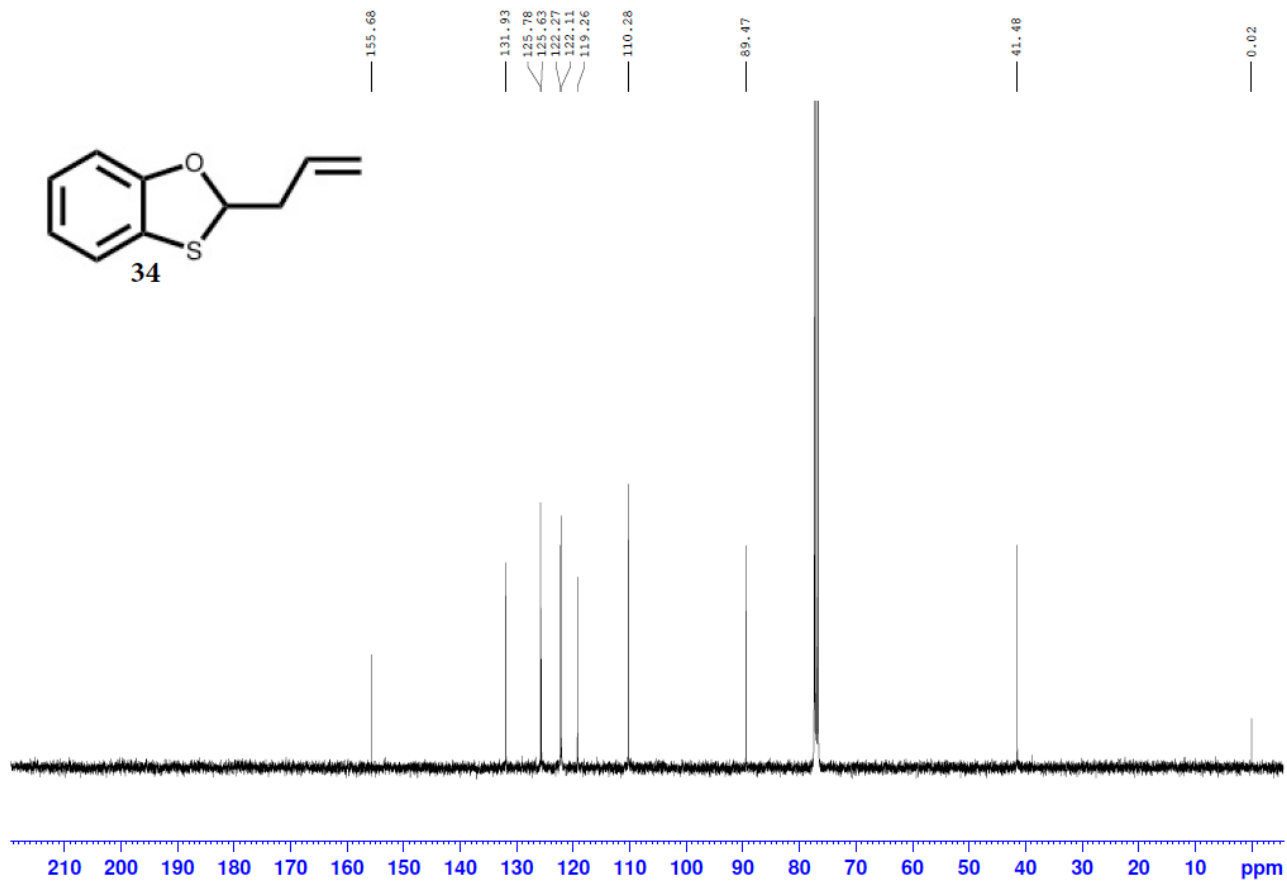

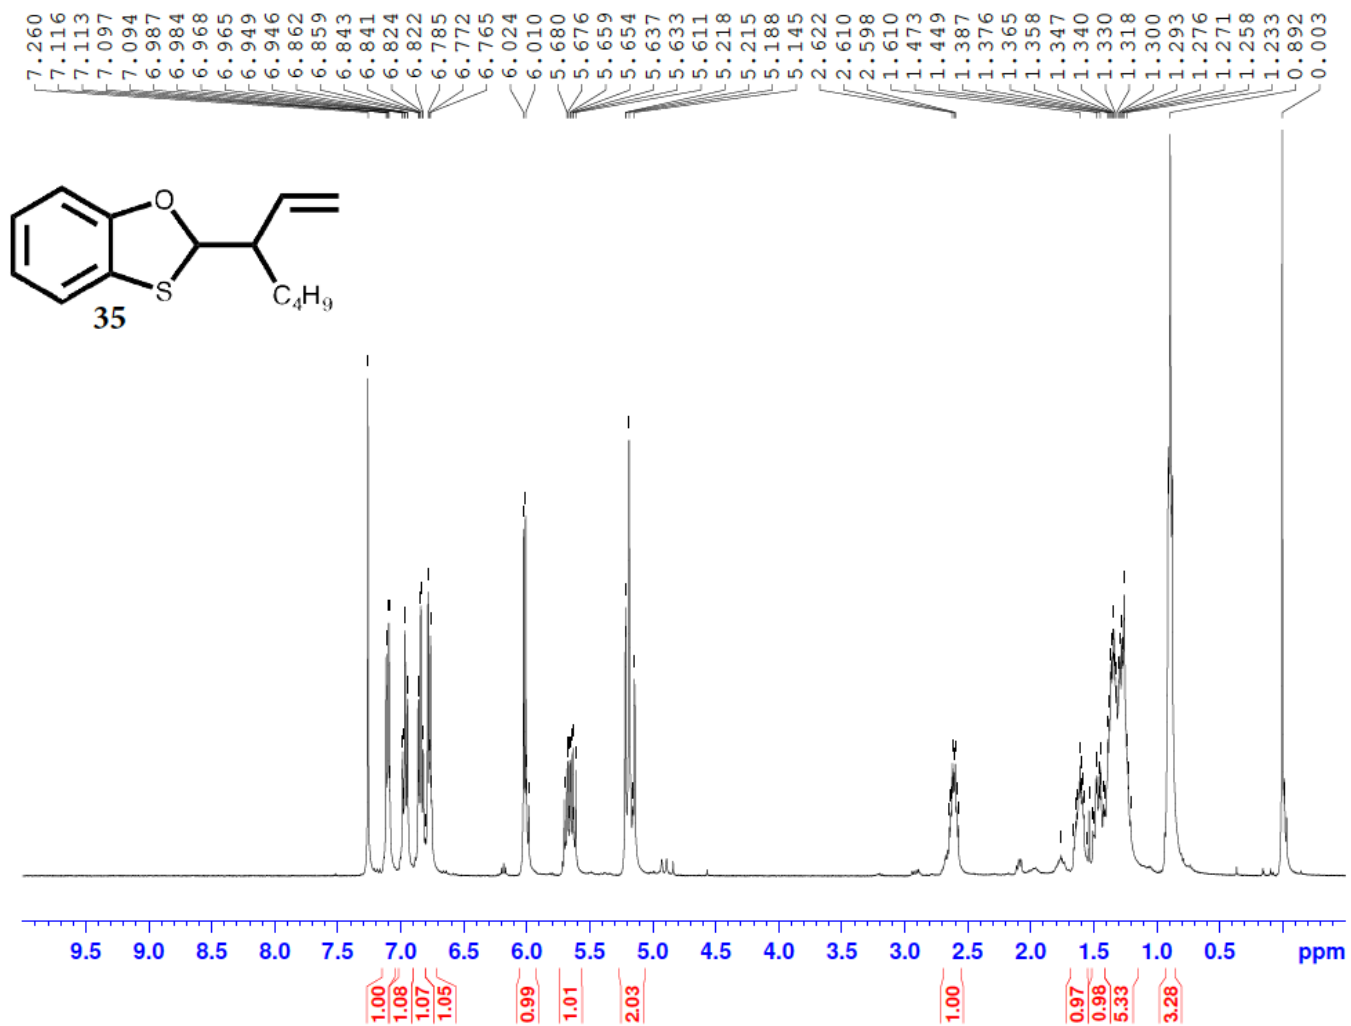

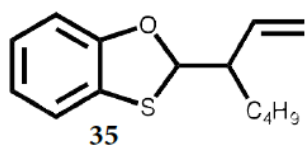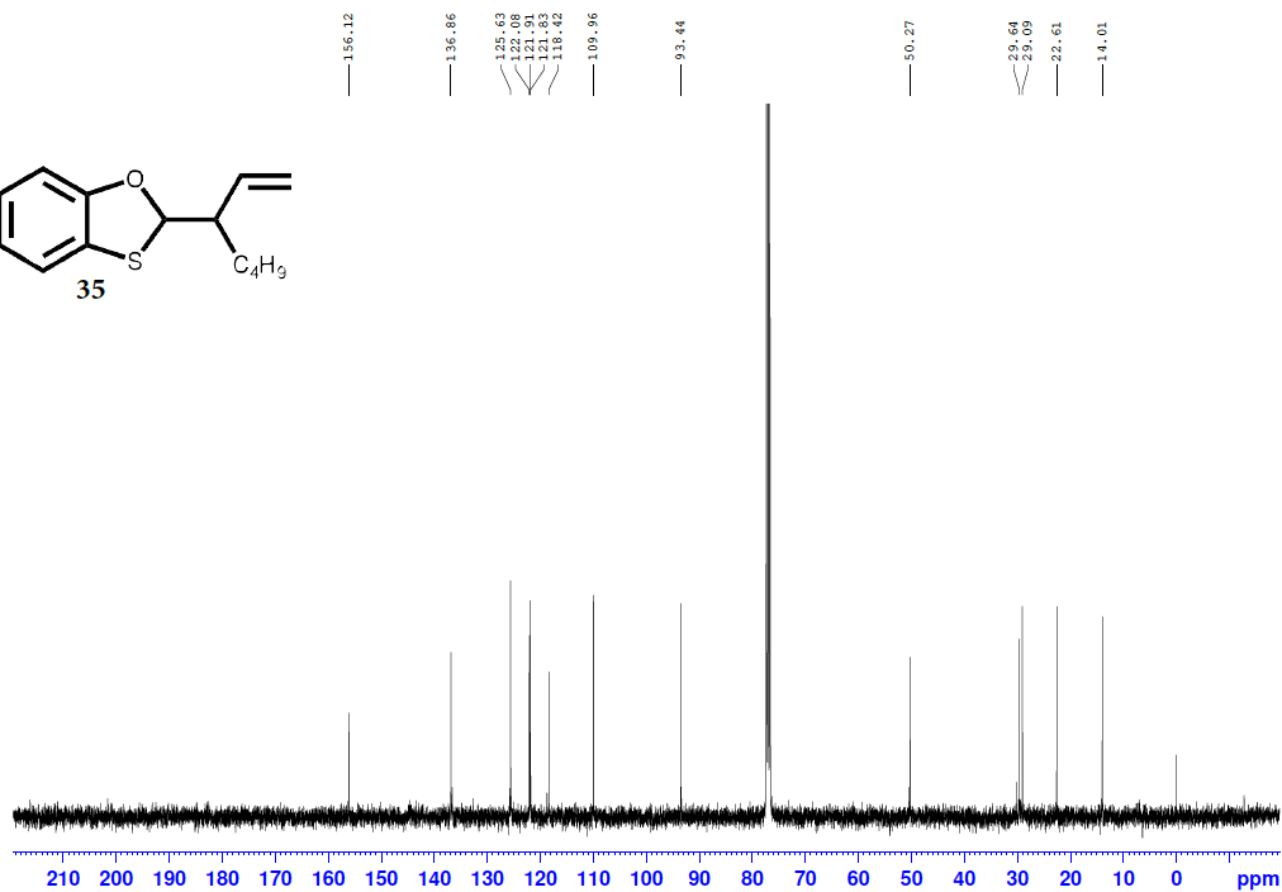

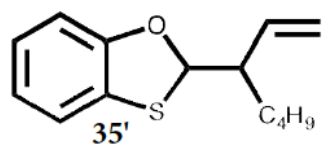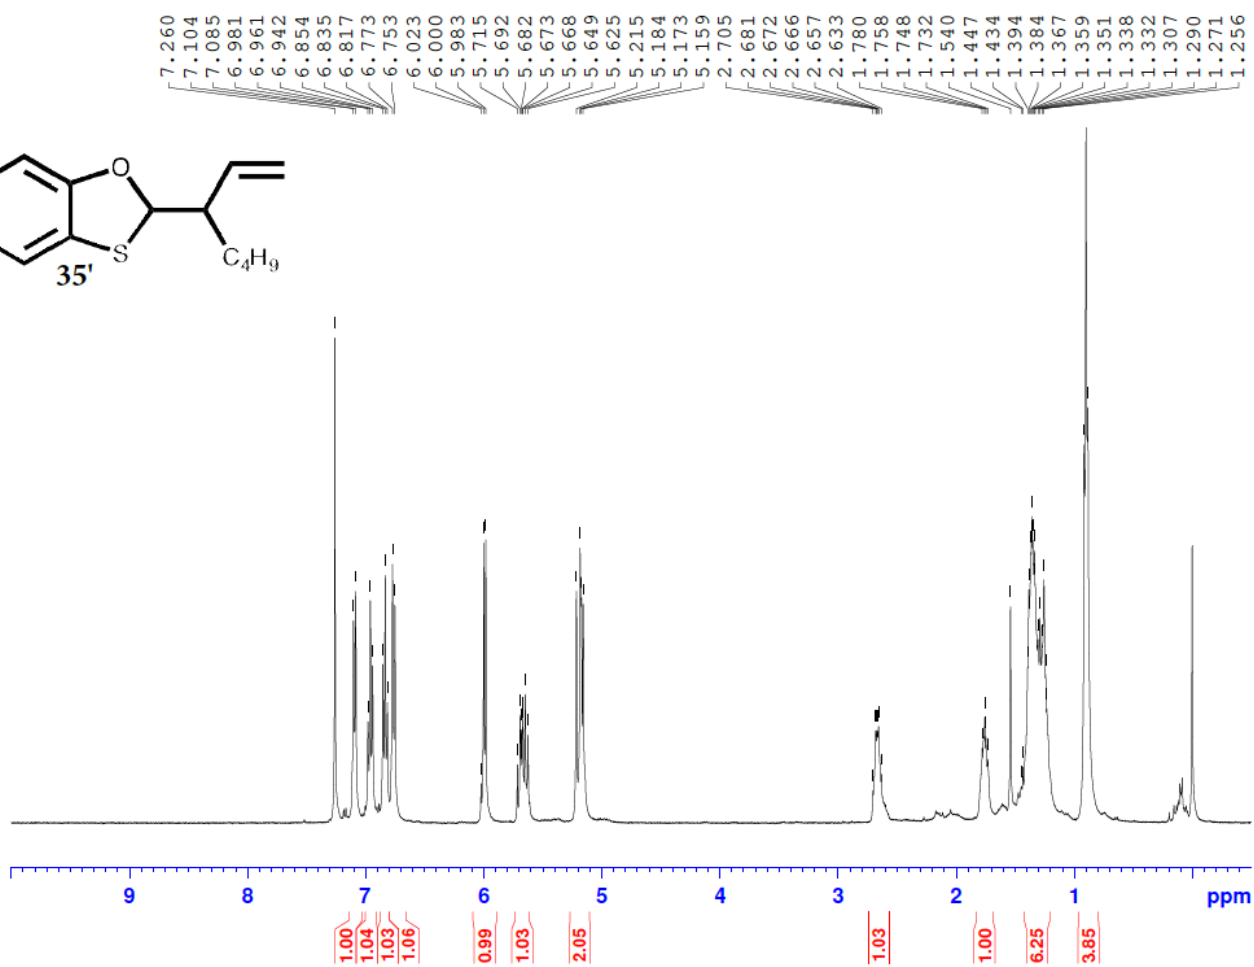

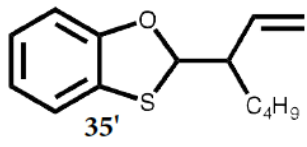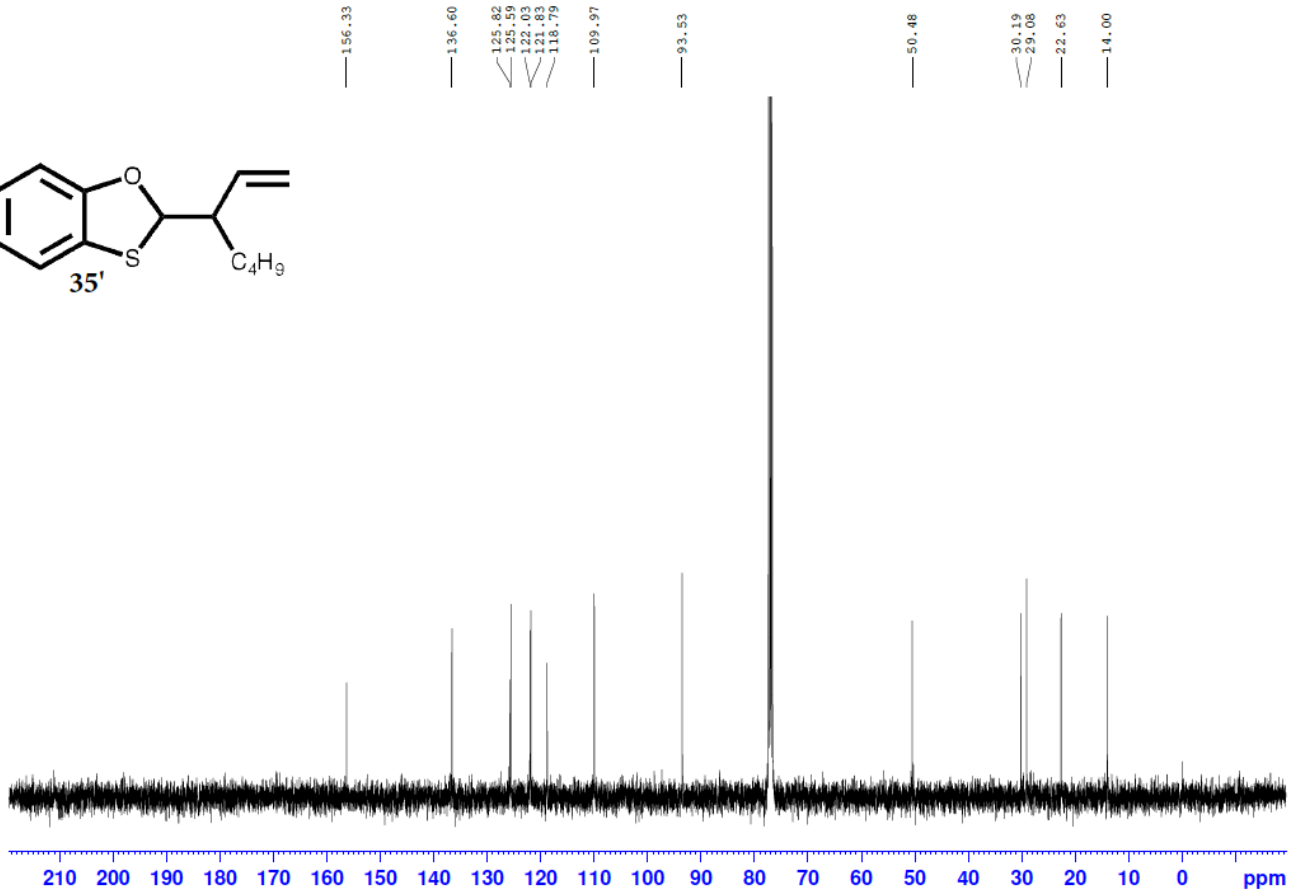

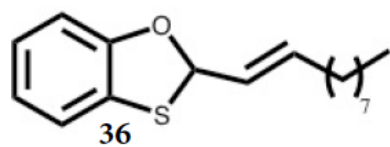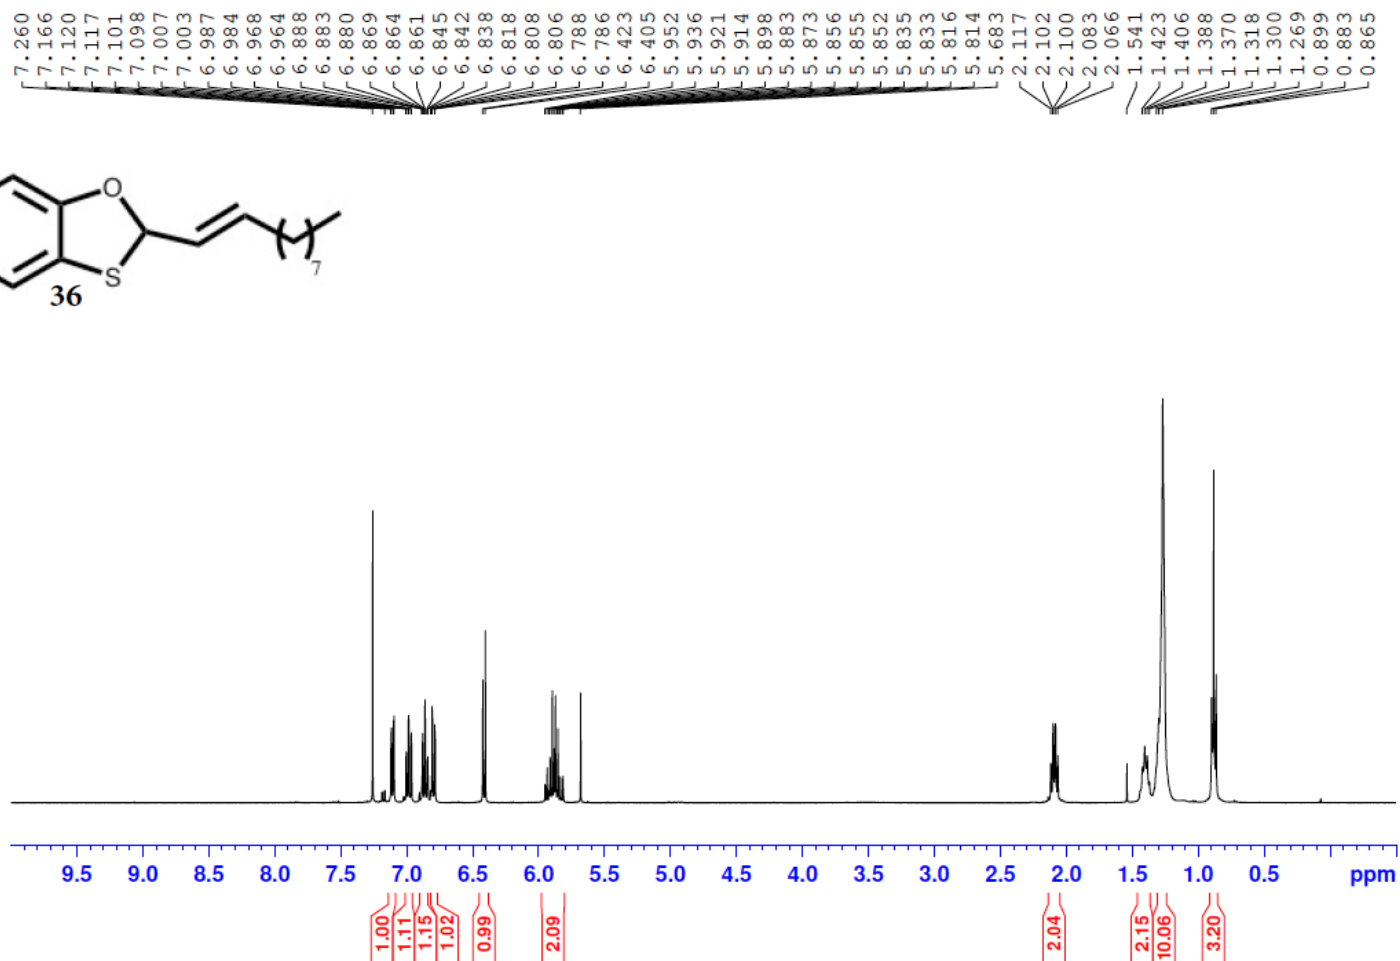

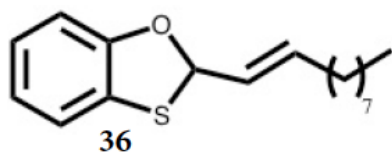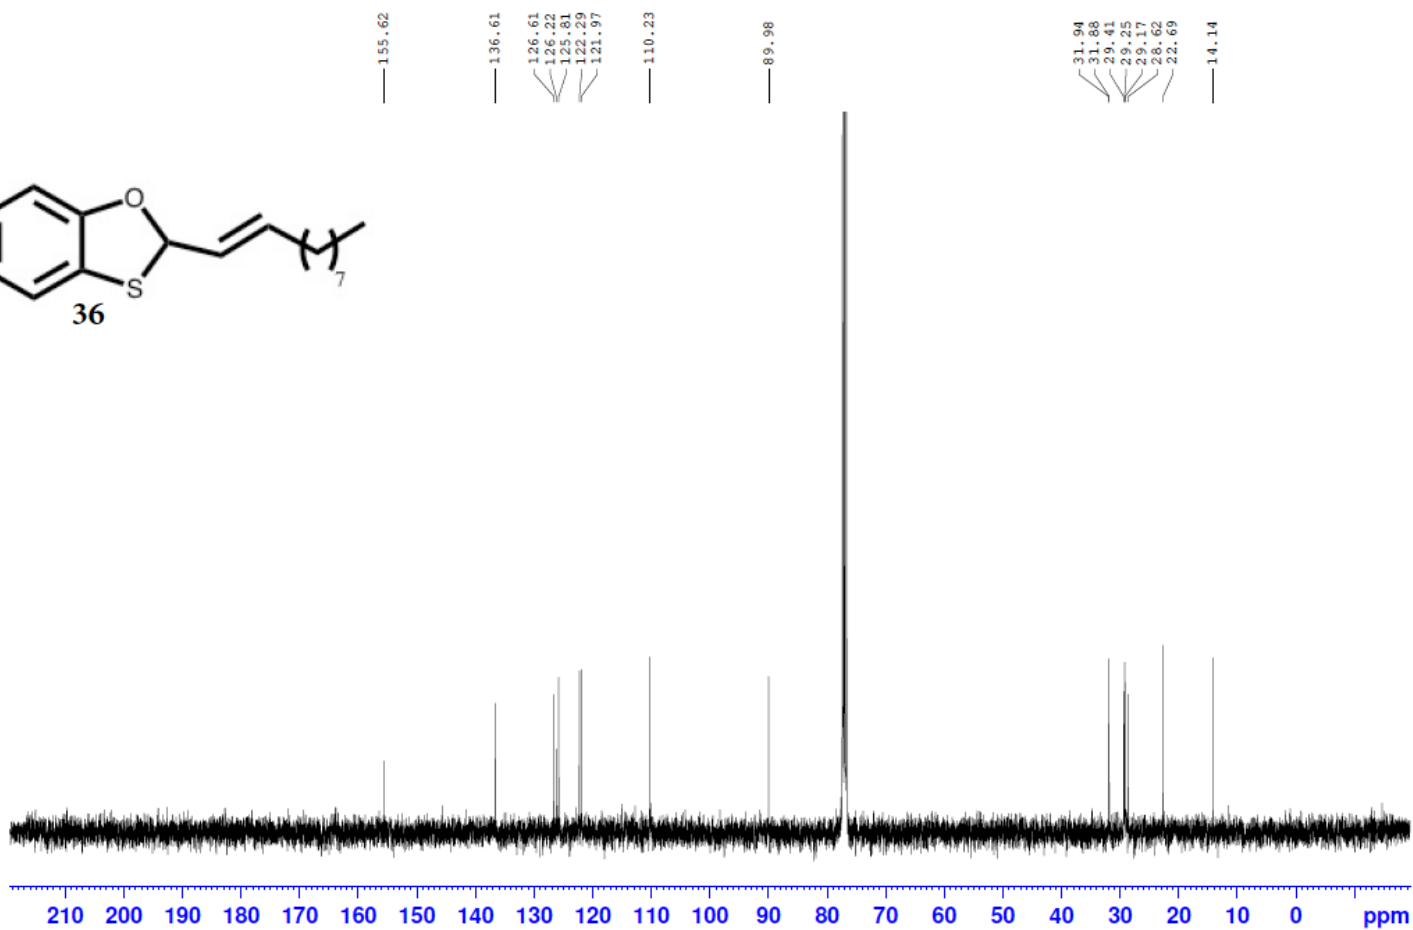



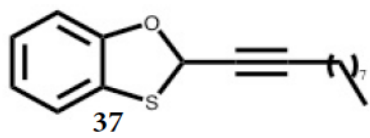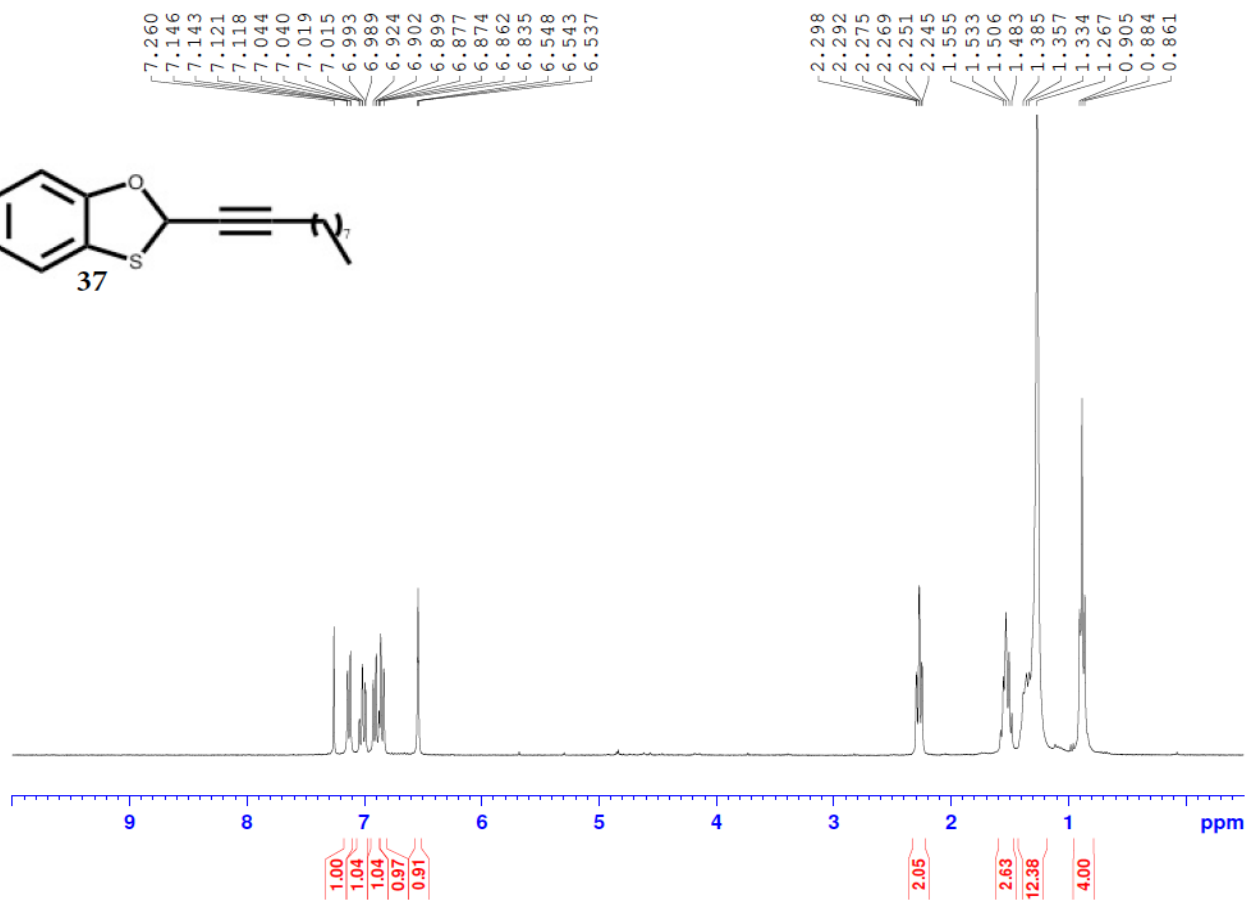

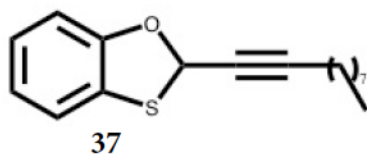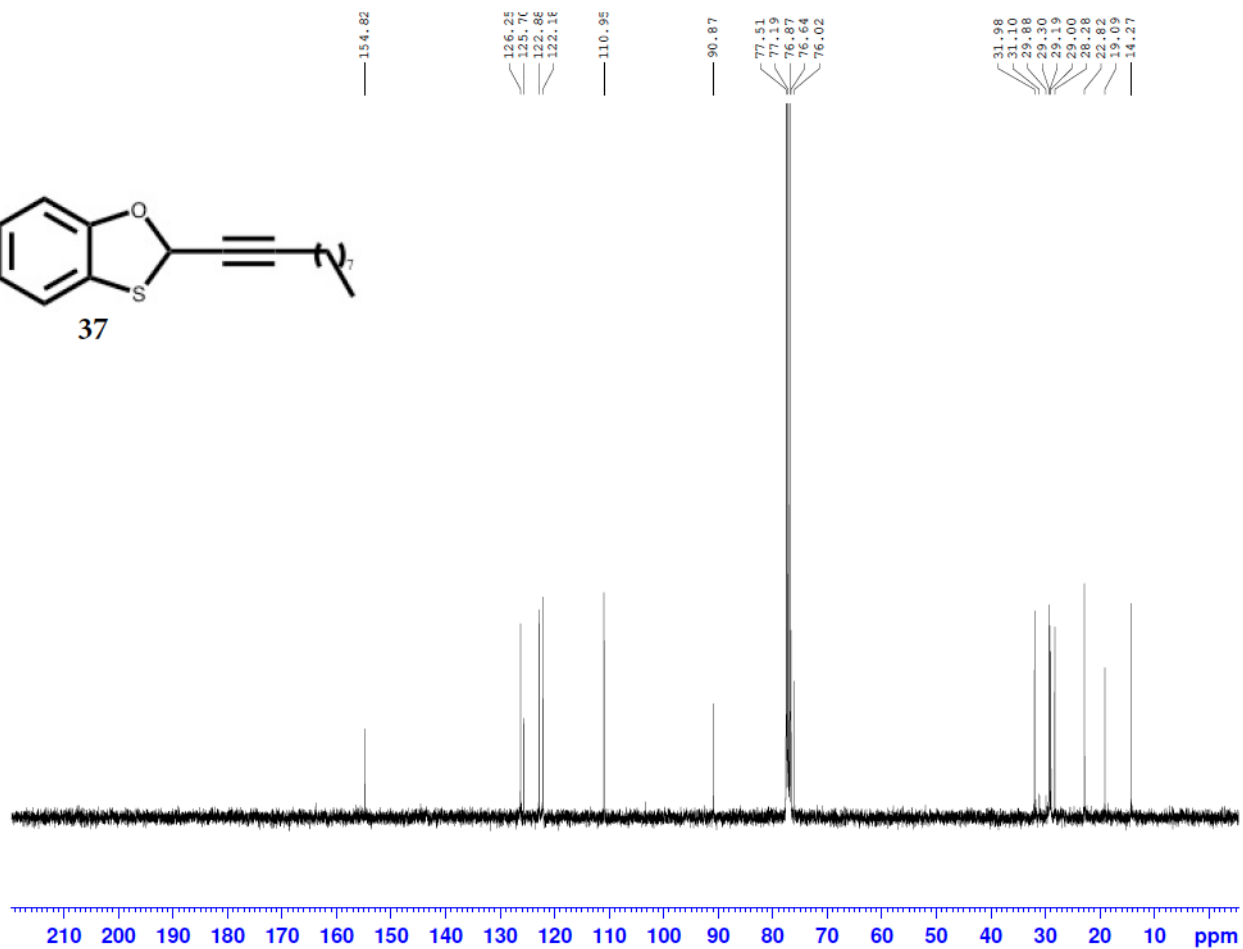

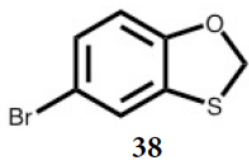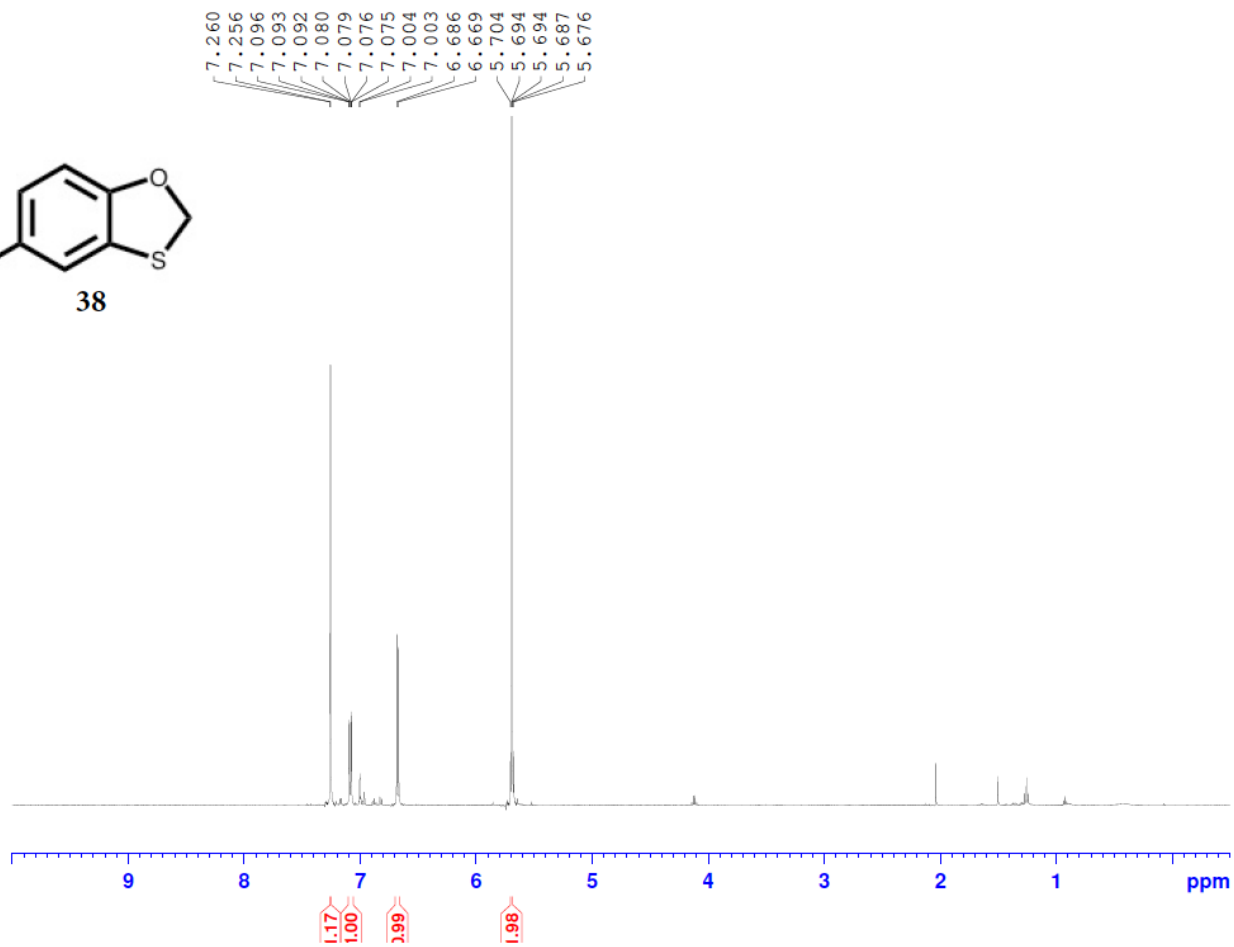

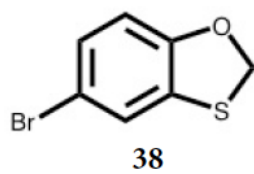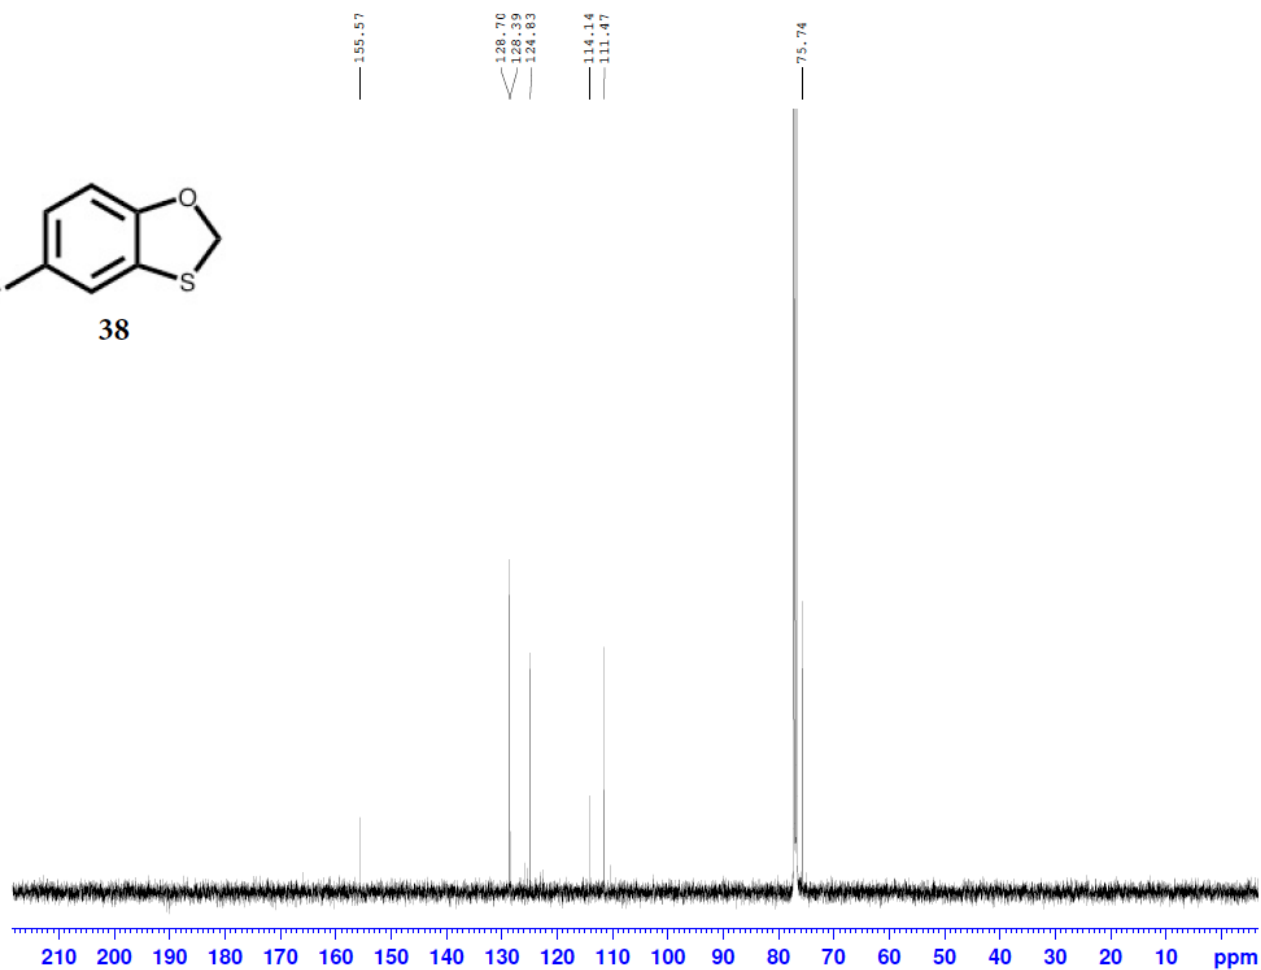

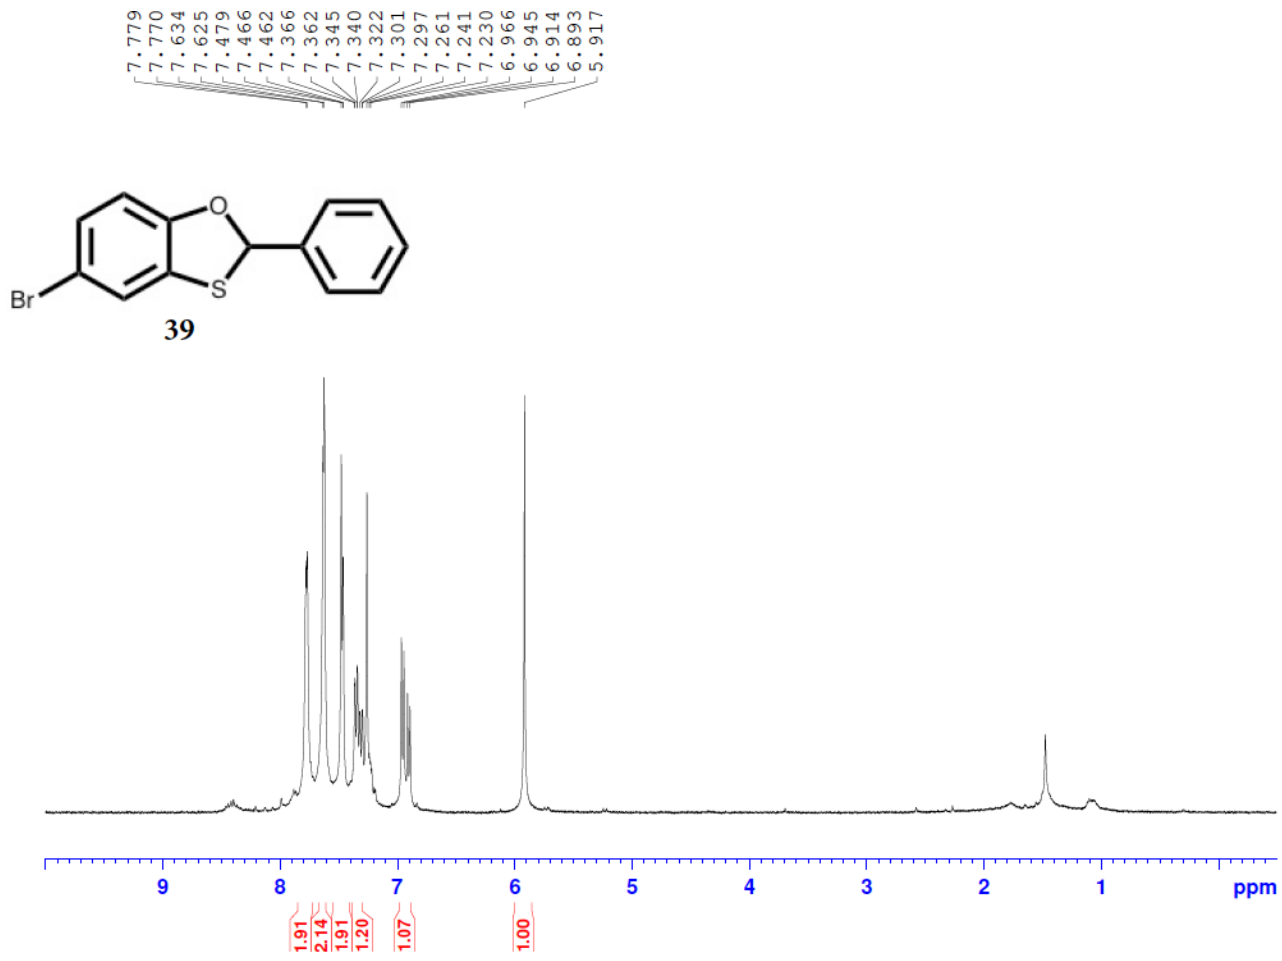

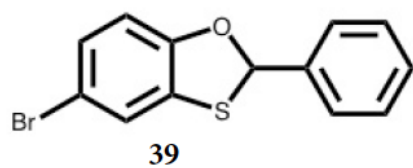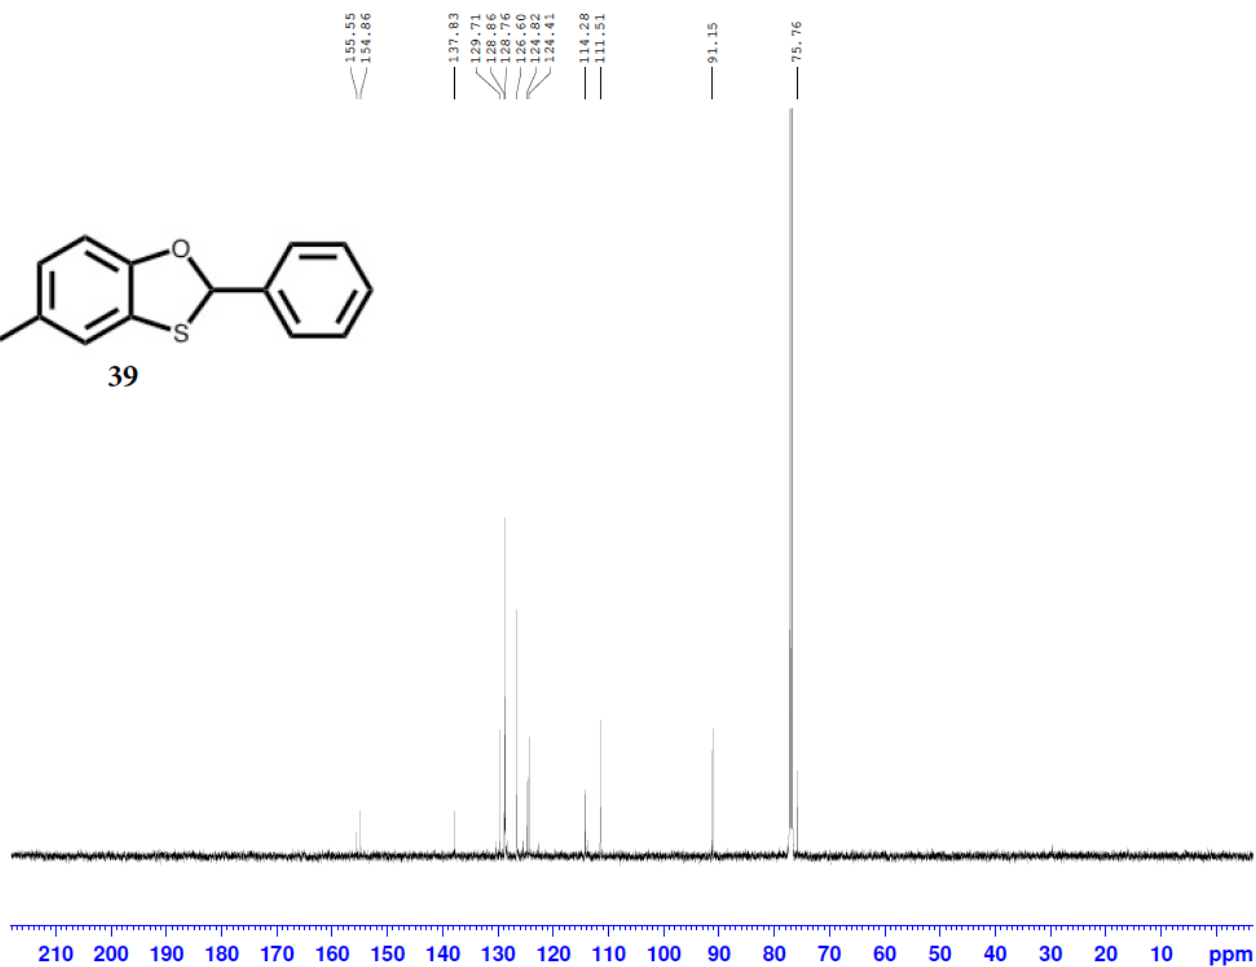

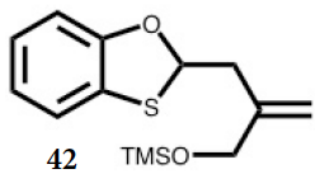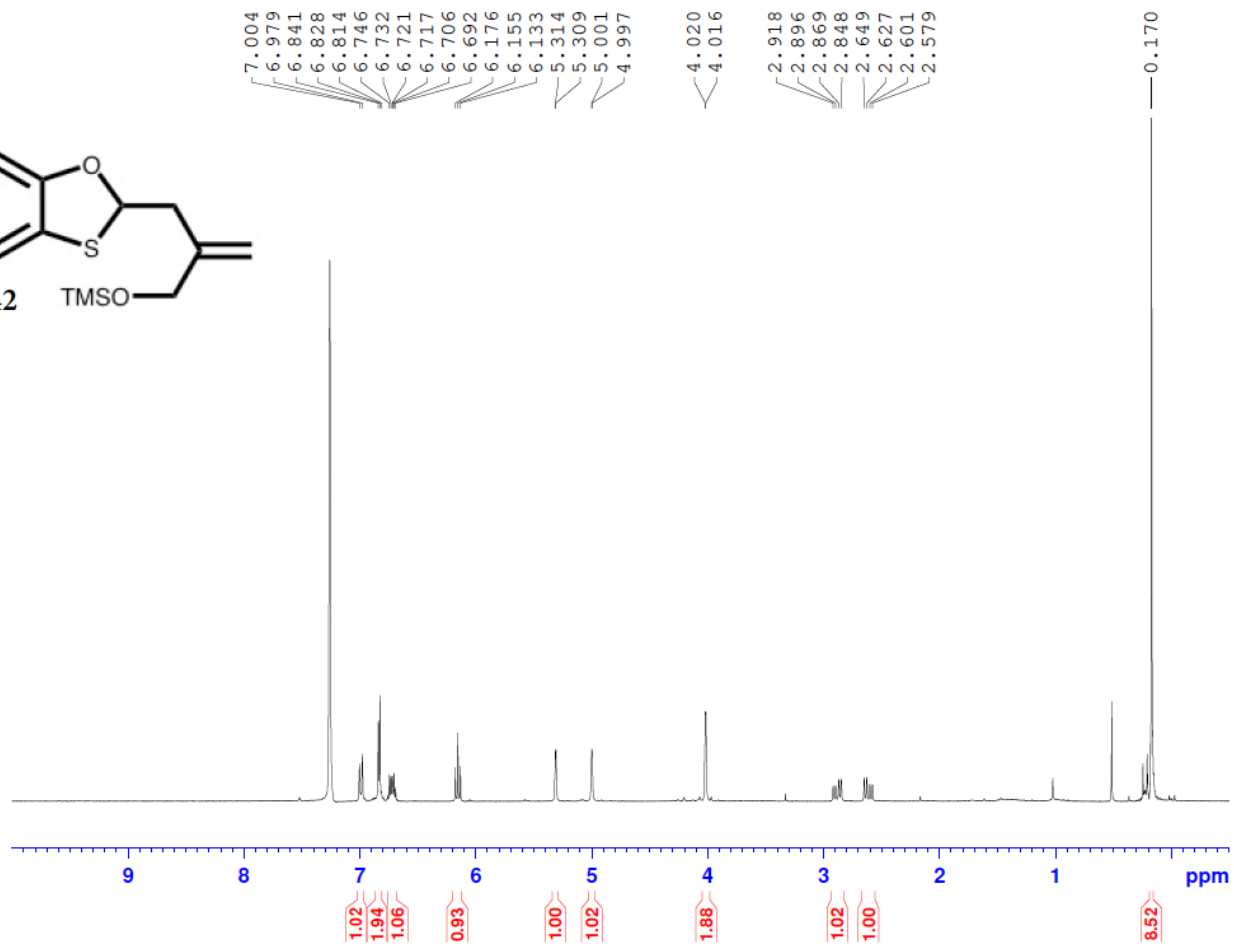

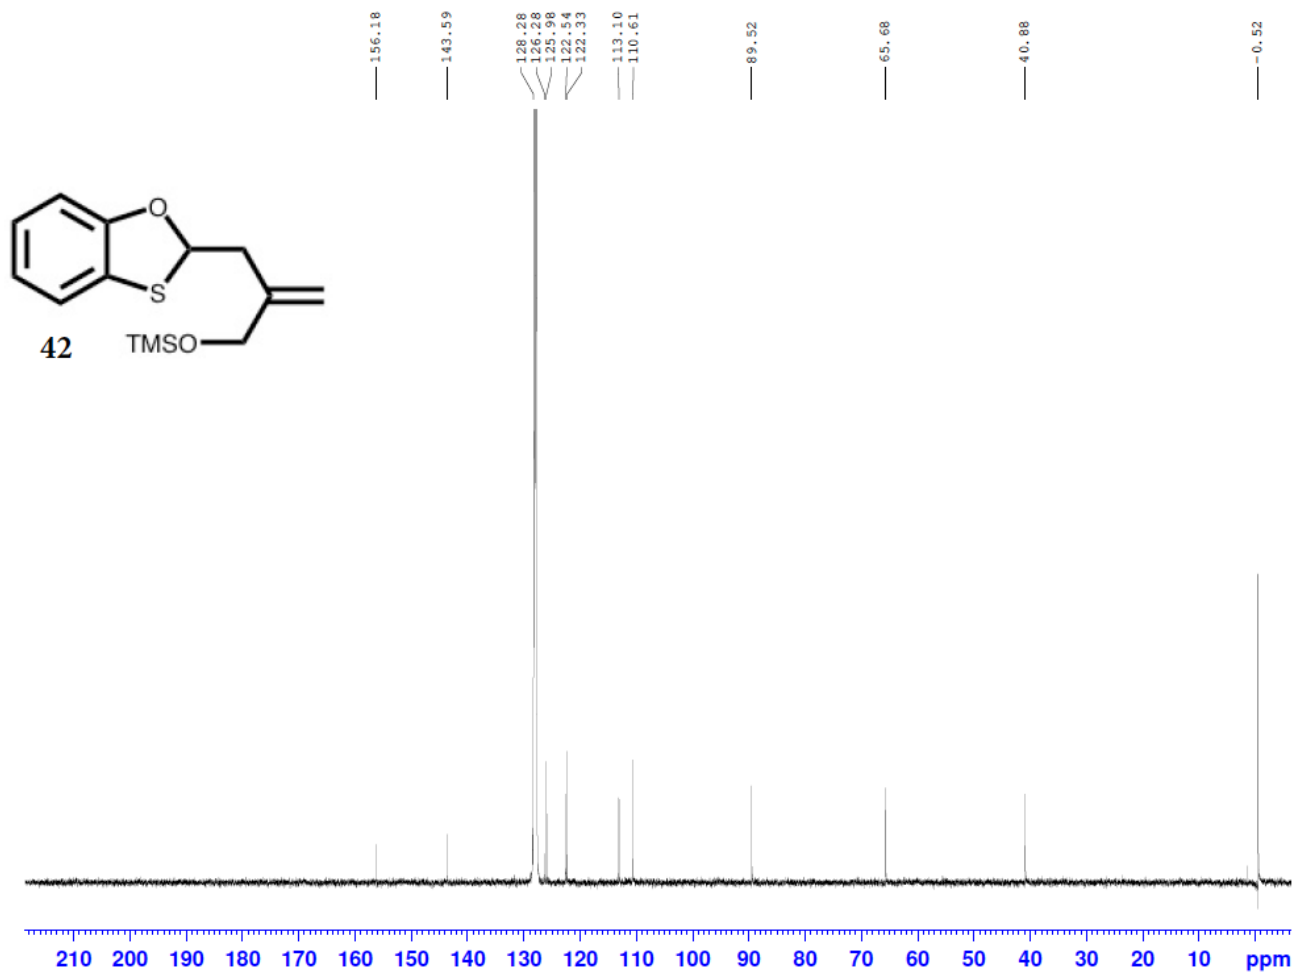



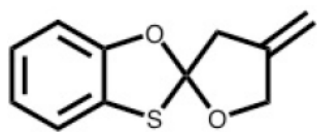

43

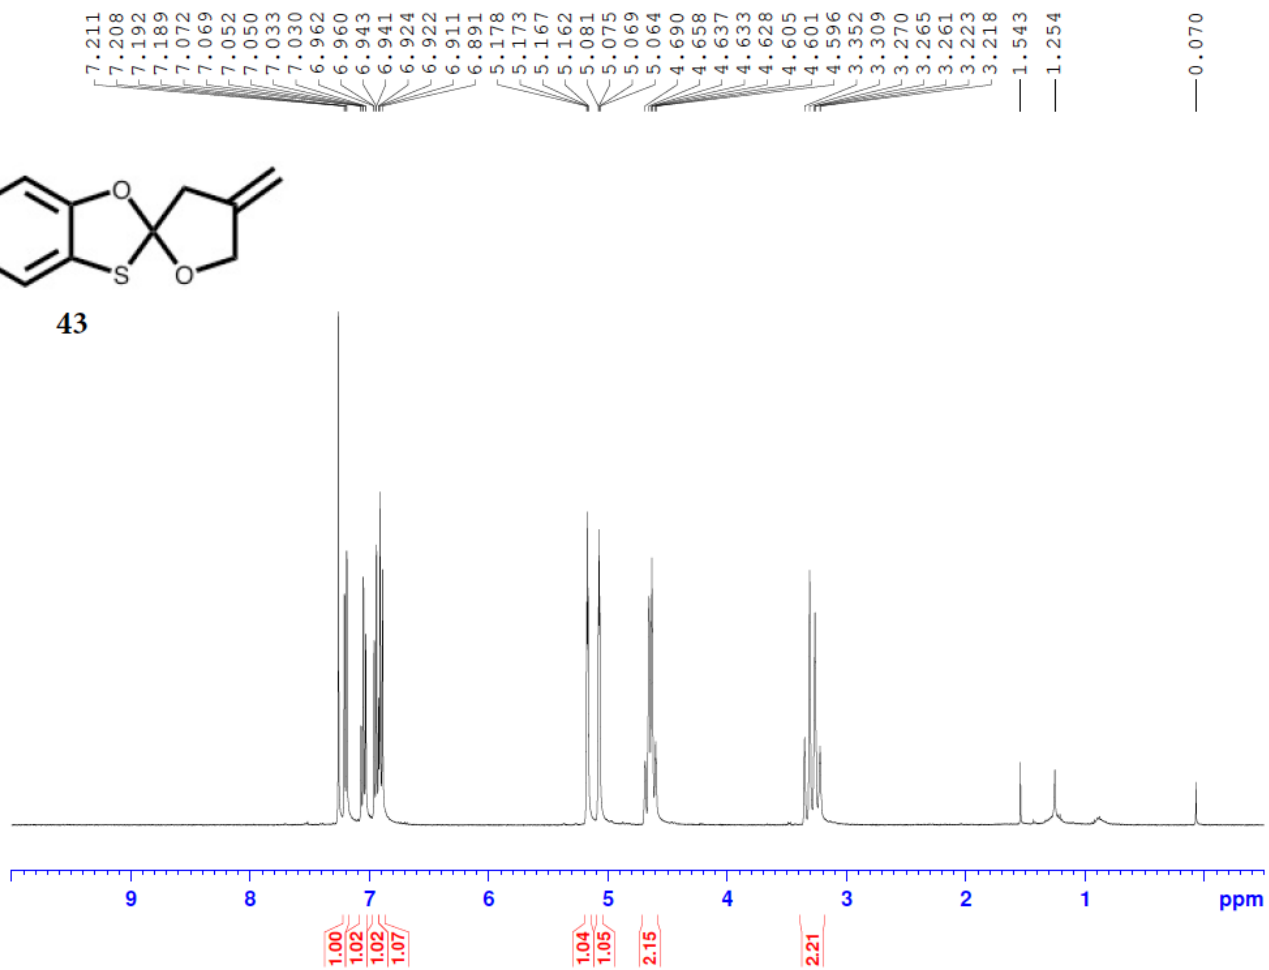

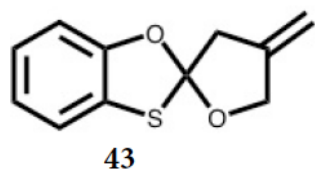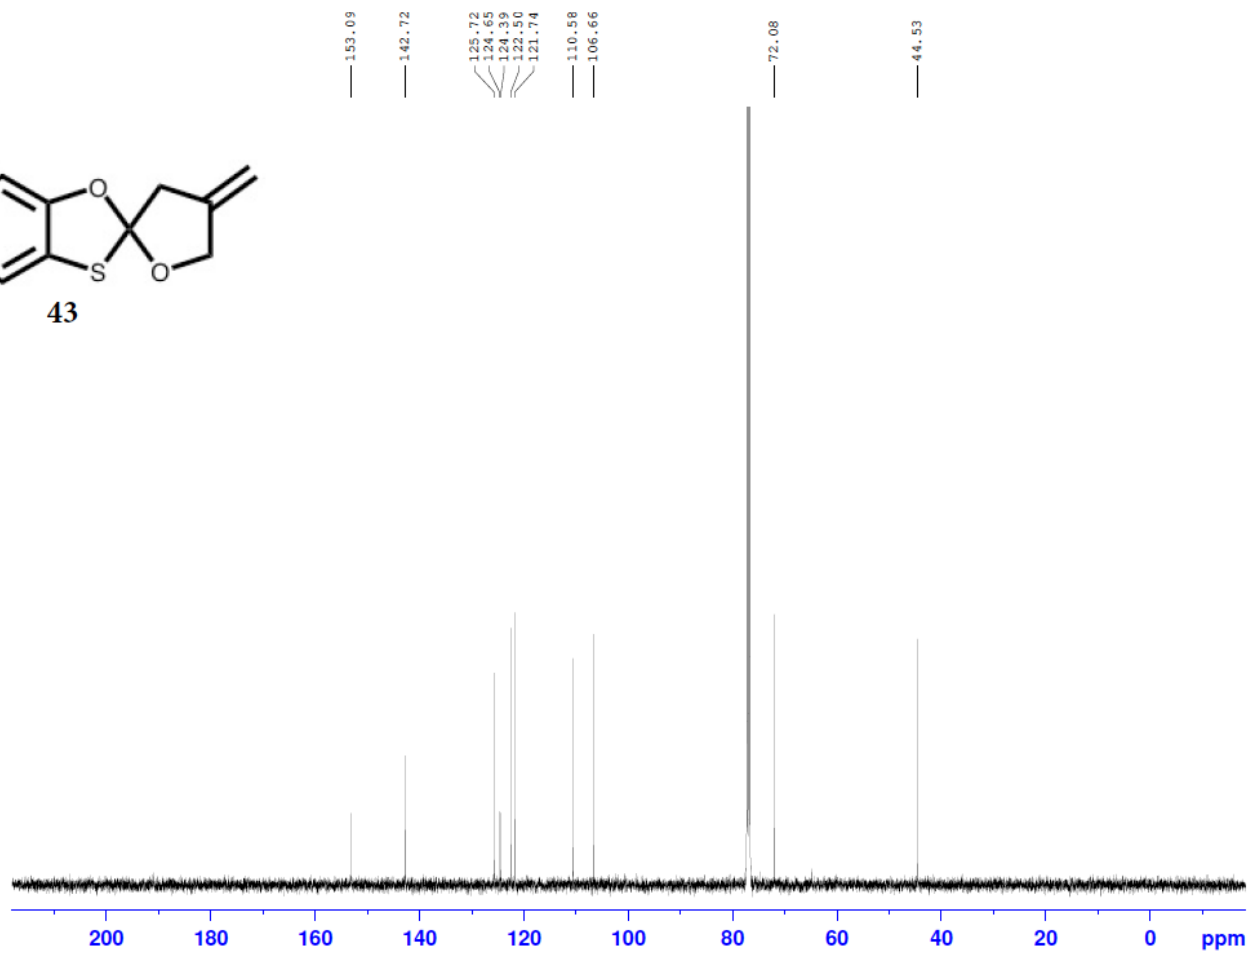

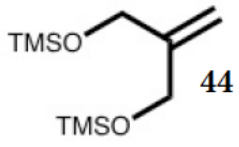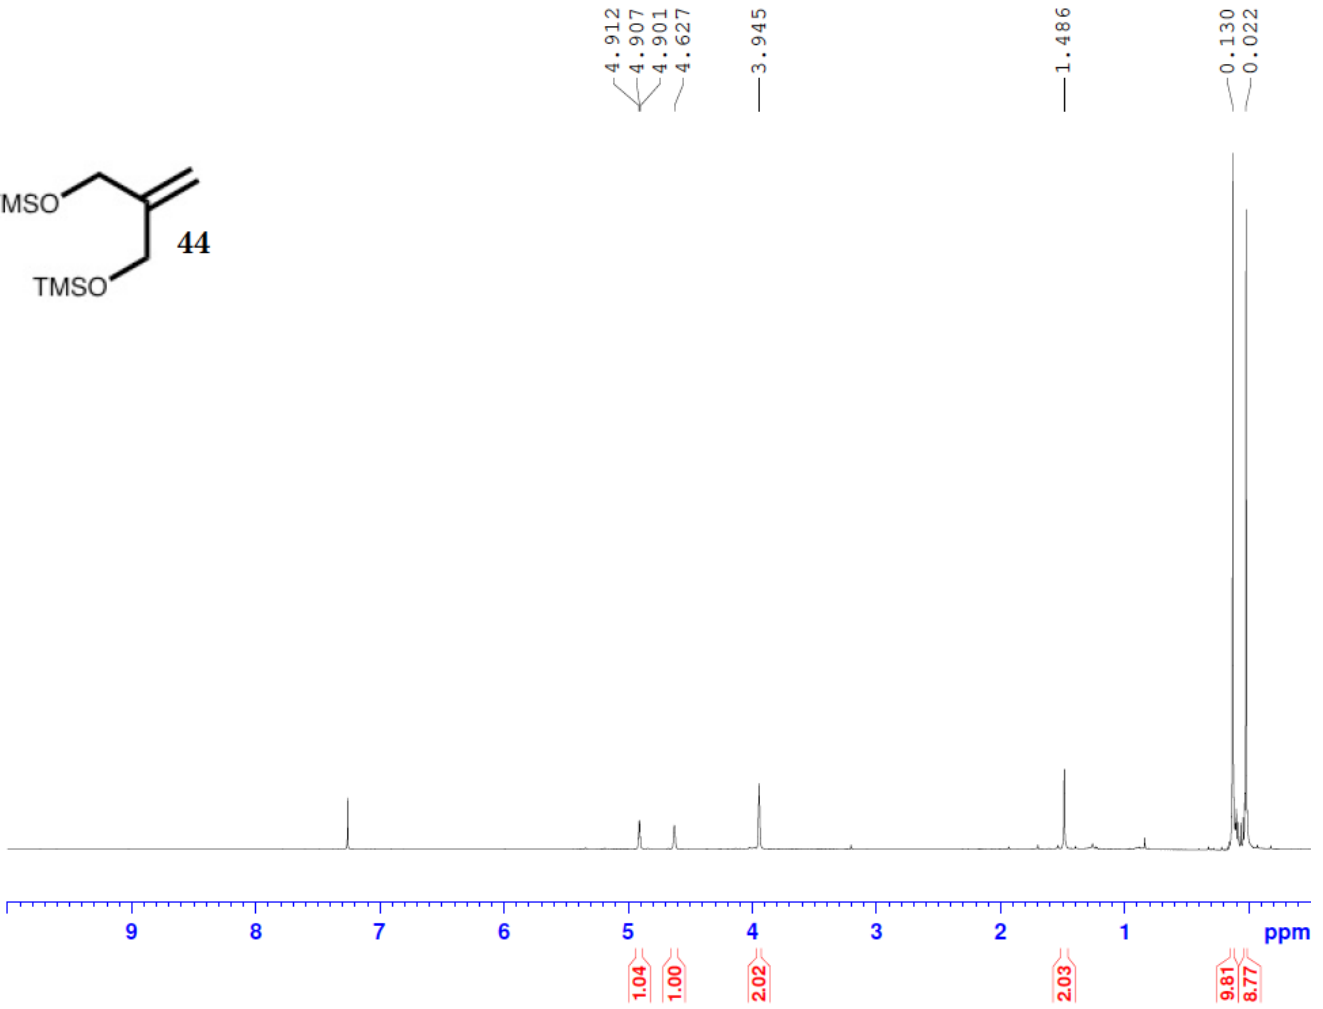

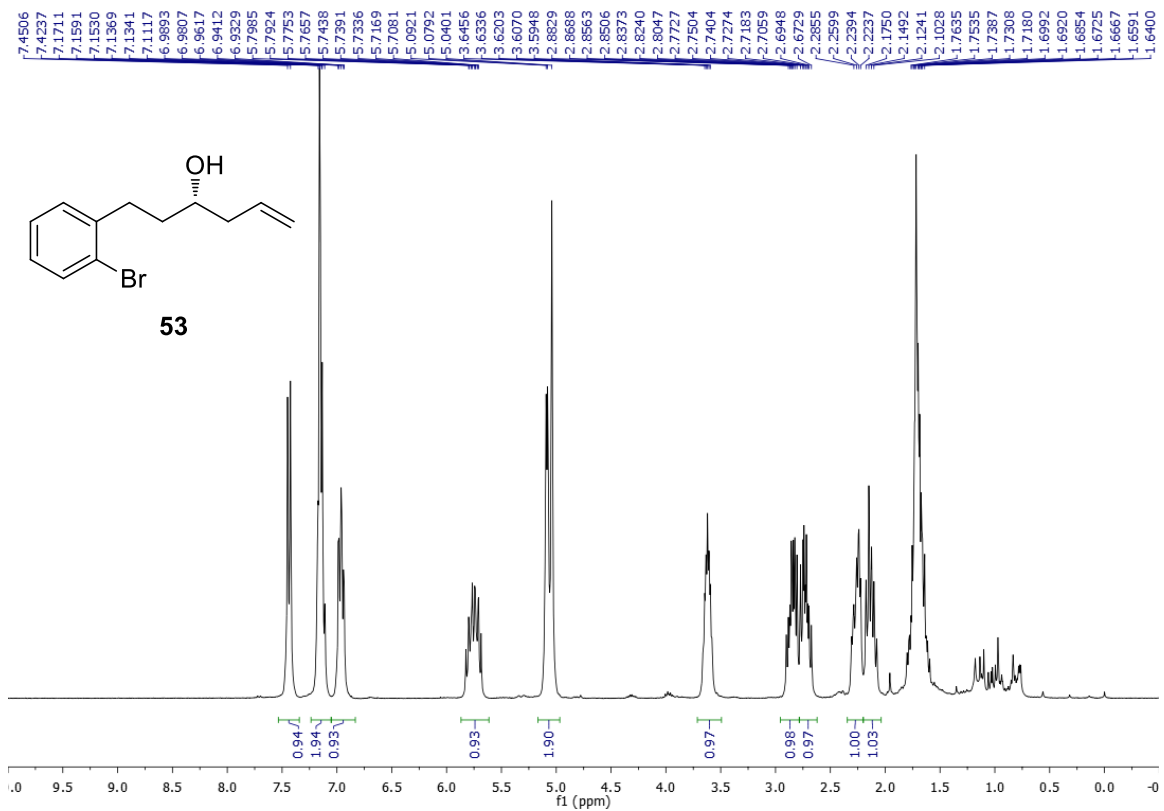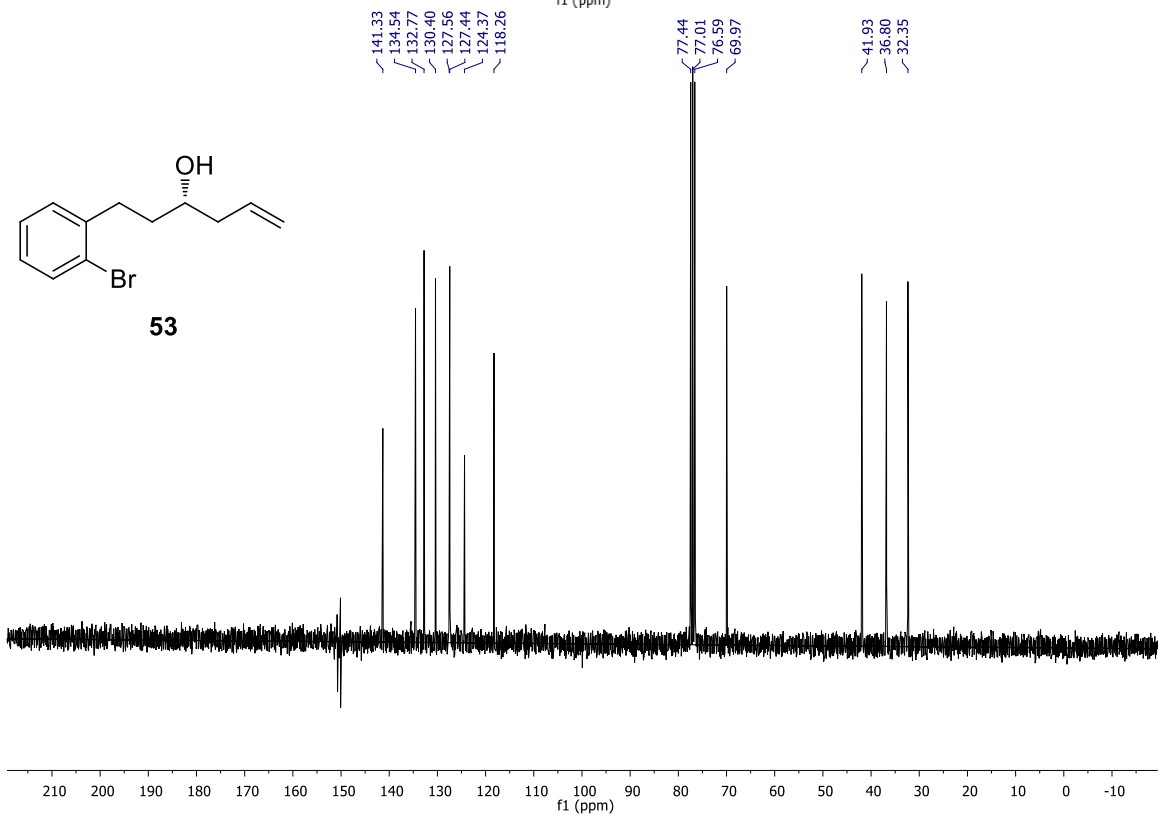

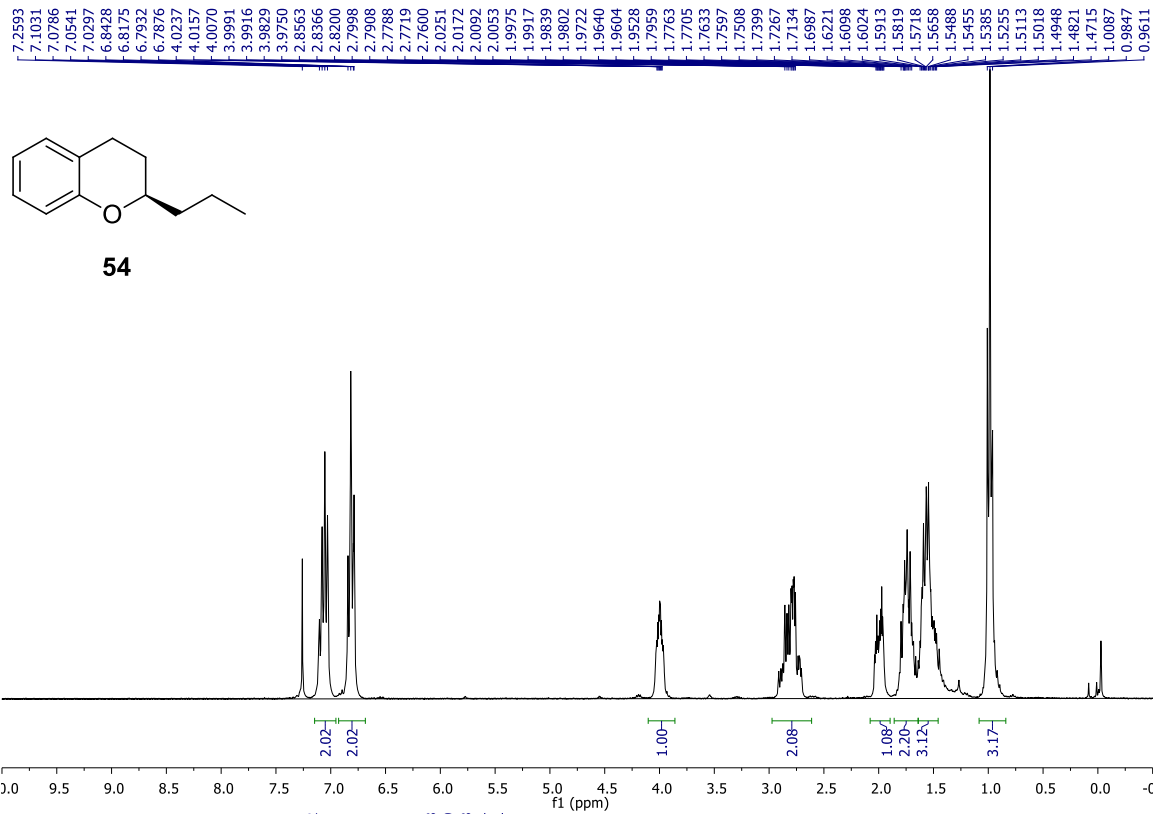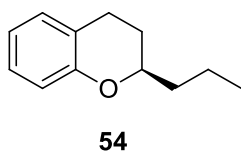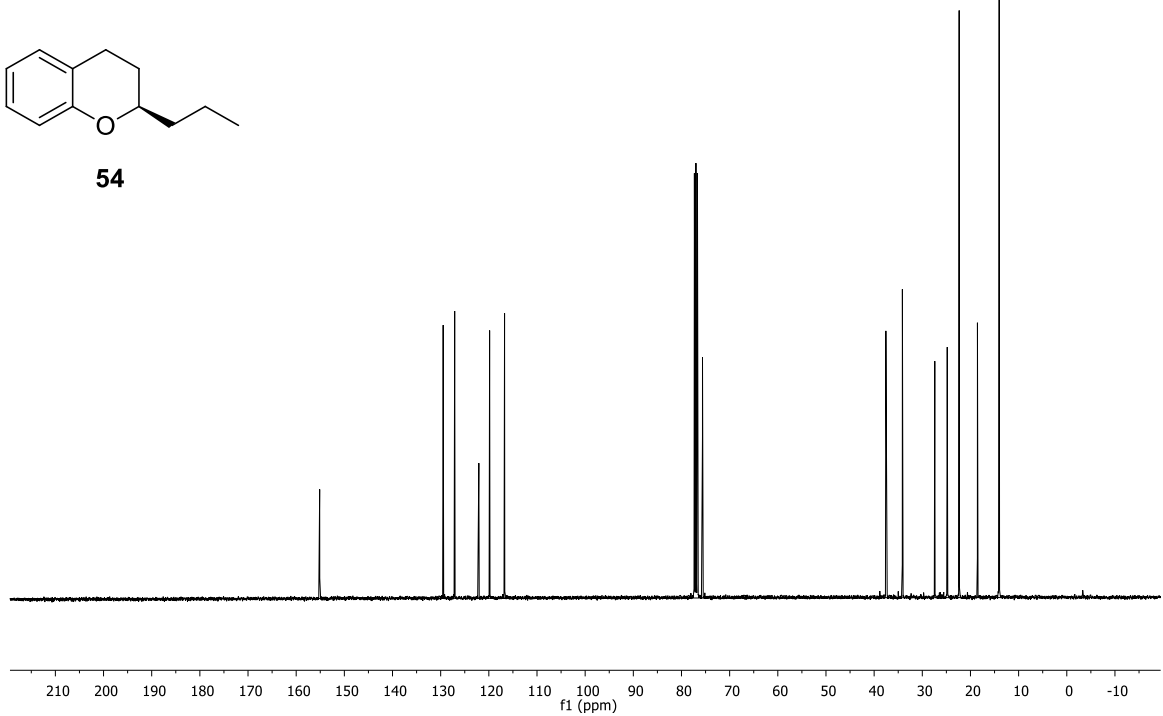

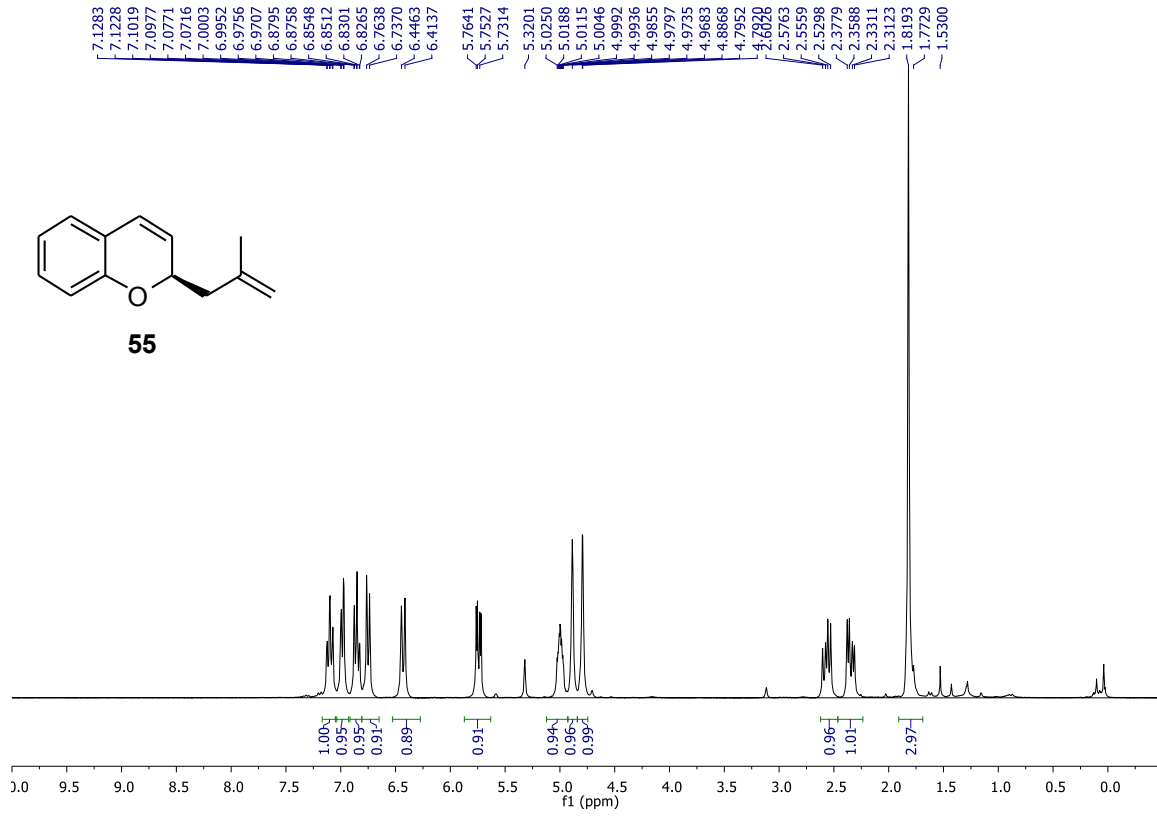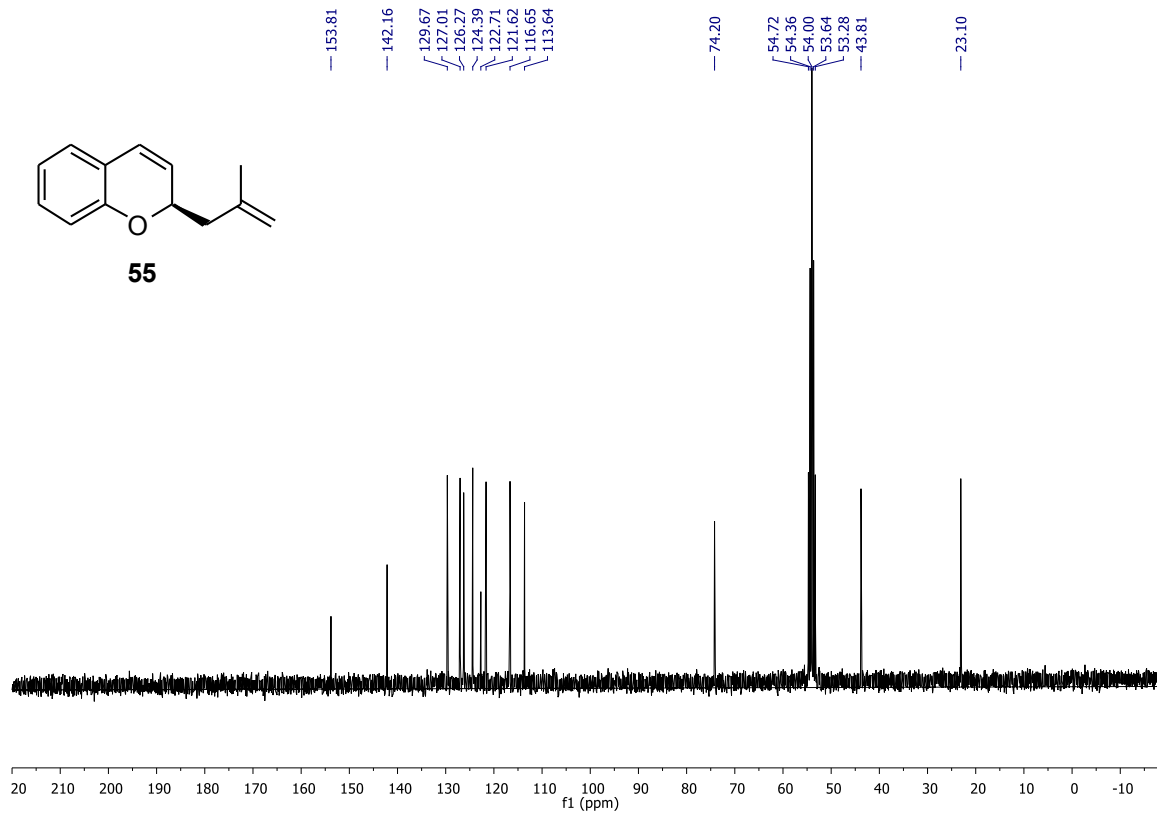

Supplement: NIHMS484876-supplement-01.pdf [file NIHMS484876-supplement-01.pdf]
